1 **Cell-type-specific meQTL extends melanoma GWAS annotation beyond eQTL and**  
2 **informs melanocyte gene regulatory mechanisms**

3

4 Tongwu Zhang<sup>1,7</sup>, Jiyeon Choi<sup>1,7</sup>, Ramile Dilshat<sup>2</sup>, Berglind Ósk Einarsdóttir<sup>2</sup>, Michael A  
5 Kovacs<sup>1</sup>, Mai Xu<sup>1</sup>, Michael Malasky<sup>3</sup>, Salma Chowdhury<sup>3</sup>, Kristine Jones<sup>3</sup>, D Timothy  
6 Bishop<sup>4</sup>, Alisa M Goldstein<sup>1</sup>, Mark M Iles<sup>4</sup>, Maria Teresa Landi<sup>1</sup>, Matthew H  
7 Law<sup>5,6</sup>, Jianxin Shi<sup>1</sup>, Eiríkur Steingrímsson<sup>2</sup>, Kevin M Brown<sup>1\*</sup>

8

9 <sup>1</sup>Division of Cancer Epidemiology and Genetics, National Cancer Institute, Bethesda,  
10 MD, 20892, USA, <sup>2</sup>Department of Biochemistry and Molecular Biology, BioMedical  
11 Center, Faculty of Medicine, University of Iceland, Sturlugata 8, Reykjavik,  
12 Iceland, <sup>3</sup>Cancer Genomics Research Laboratory, Division of Cancer Epidemiology and  
13 Genetics, National Cancer Institute, Bethesda, MD, 20892, USA, <sup>4</sup>Leeds Institute for  
14 Data Analytics, School of Medicine, University of Leeds, Leeds, UK, <sup>5</sup>Statistical  
15 Genetics, QIMR Berghofer Medical Research Institute, Brisbane, Queensland,  
16 Australia, <sup>6</sup>School of Biomedical Sciences, Faculty of Health, and Institute of Health and  
17 Biomedical Innovation, Queensland University of Technology, Kelvin Grove,  
18 Queensland, Australia

19

20 <sup>7</sup>These authors contributed equally to this work

21 \*Correspondence: [kevin.brown3@nih.gov](mailto:kevin.brown3@nih.gov), @kbrowngenetics

## 22 **Abstract**

23 While expression quantitative trait loci (eQTL) have been powerful in identifying susceptibility  
24 genes from genome-wide association studies (GWAS) findings, most trait-associated loci are  
25 not explained by eQTL alone. Alternative QTLs including DNA methylation QTL (meQTL) are  
26 emerging, but cell-type-specific meQTL using cells of disease origin has been lacking. Here we  
27 established an meQTL dataset using primary melanocytes from 106 individuals and identified  
28 1,497,502 significant *cis*-meQTLs. Multi-QTL colocalization using meQTL, eQTL, and mRNA  
29 splice-junction QTL from the same individuals together with imputed methylome-wide and  
30 transcriptome-wide association studies identified susceptibility genes at 63% of melanoma  
31 GWAS loci. Among three molecular QTLs, meQTLs were the single largest contributor. To  
32 compare melanocyte meQTLs with those from malignant melanomas, we performed meQTL  
33 analysis on skin cutaneous melanomas from The Cancer Genome Atlas (n = 444). A substantial  
34 proportion of meQTL probes (45.9%) in primary melanocytes are preserved in melanomas,  
35 while a smaller fraction of eQTL genes is preserved (12.7%). Integration of melanocyte multi-  
36 QTL and melanoma meQTL identified candidate susceptibility genes at 72% of melanoma  
37 GWAS loci. Beyond GWAS annotation, meQTL-eQTL colocalization in melanocytes suggested  
38 that 841 unique genes potentially share a causal variant with a nearby methylation probe in  
39 melanocytes. Finally, melanocyte *trans*-meQTL identified a hotspot for rs12203592, a *cis*-eQTL  
40 of a transcription factor, IRF4, with 131 candidate target CpGs. Motif enrichment and IRF4  
41 ChIPseq analysis demonstrated that these target CpGs are enriched in IRF4 binding sites,  
42 suggesting an IRF4-mediated regulatory network. Our study highlights the utility of cell-type-  
43 specific meQTL.

## 44 Introduction

45 Expression quantitative trait loci (eQTL) studies have been powerful for nominating  
46 candidate causal genes for loci identified via genome-wide association studies (GWAS) of many  
47 complex traits and diseases, including cancer susceptibility. Most prominently, the Genotype-  
48 Tissue Expression (GTEx) project has made eQTL data publicly available for more than 50  
49 tissue types<sup>1</sup>. Most eQTL datasets including GTEx, however, are based on heterogeneous bulk  
50 tissues, where cell-type-specific allelic regulation of gene expression in rarer cell types may be  
51 obscured by signals from other cell types, and thus may go undetected. Colocalization analyses  
52 using the most recent GTEx dataset demonstrated that a median of 21% of GWAS loci from 87  
53 tested complex traits colocalized with a *cis*-eQTL when aggregated across 49 tissue types<sup>1</sup>.  
54 While cell-type interacting eQTLs by computational deconvolution of bulk tissue data improves  
55 colocalization compared to that by standard eQTL only<sup>2,3</sup>, most GWAS loci nonetheless lack  
56 colocalizing eQTLs.

57 A recent melanoma GWAS meta-analysis identified a total of 54 loci reaching genome-  
58 wide significance<sup>4</sup>, increasing the total number of melanoma risk-associated loci by more than  
59 three-fold compared to the largest existing study<sup>5</sup>. We previously demonstrated that eQTLs from  
60 cultured melanocytes<sup>6</sup>, the cell type of origin for melanoma, efficiently identified candidate  
61 susceptibility genes for 25%<sup>5,6</sup> and 16%<sup>4</sup> of two recent melanoma GWAS loci through  
62 colocalization. Notably, as melanocytes represent only a small fraction of typical skin biopsies,  
63 even this moderately sized melanocyte eQTL dataset (n = 106) was able to identify candidate  
64 causal genes that were not captured by GTEx skin tissue eQTLs from sample sets three times  
65 larger<sup>6</sup>. These data highlighted the utility of cell-type-specific QTL resources, however, eQTL  
66 alone was still not sufficient to explain the majority of GWAS loci.

67 DNA methylation of cytosine at CpG dinucleotides is an important mode of epigenetic  
68 gene regulation. While CpG methylation is interconnected with mRNA expression, their

69 relationship is rather complex. In tumors, hypermethylation has been observed in the promoters  
70 of inactivated tumor suppressor genes<sup>7</sup>. Gene body methylation, on the other hand, is usually  
71 correlated with higher mRNA expression and tends to be inversely correlated with promoter  
72 methylation<sup>8</sup>. Further, it is not always clear whether methylation/demethylation actively initiates  
73 gene expression repression/activation, or instead, methylation levels reflect repressed/activated  
74 expression status<sup>9</sup>. While DNA methylation has been more widely studied as a marker of  
75 epigenetic regulation in population studies (e.g. EWAS<sup>10</sup>), DNA methylation is also under tight  
76 genetic control as shown by methylation QTL (meQTL) studies. In particular, *trans*-meQTL has  
77 been powerful in identifying transcription factor-mediated regulation networks and large  
78 numbers of target CpGs<sup>11–13</sup>, in contrast to relatively small numbers of *trans*-eQTL genes or  
79 *trans*-sQTL genes when using gene expression data<sup>1</sup>.

80 meQTL studies to date have largely been limited to blood and blood-related cell  
81 types<sup>11,12,14–20</sup>, with a few exceptions of studies of normal bulk tissues<sup>13,21–23</sup> and tumor  
82 tissues<sup>24,25</sup>. Overall, cell-type-specific meQTL studies from non-blood samples have largely  
83 been lacking. Particularly in the context of cancer, understanding a heritable component of DNA  
84 methylation in the cell types where the tumor originates may help answer questions about how  
85 methylation and gene expression are co-regulated through genetic variants and how much of  
86 that genetic regulation is still observed during the malignant transformation where multiple  
87 genetic and non-genetic events could mask gene expression variance explained by germline  
88 variants.

89 In this study, we explore the roles of cell-type-specific meQTLs derived from human  
90 primary melanocytes in explaining melanoma-risk associated genetic signals through multi-QTL  
91 colocalization as well as imputed methylome-wide association study (MWAS)<sup>26</sup>. We further  
92 compare genetic control of DNA methylation in melanocytes with that of malignant melanoma  
93 tissues. We then interrogate the relationship of eQTL and meQTL in melanocytes and further  
94 identify a melanocyte-specific transcriptional hub through *trans*-meQTL study.

## 95 **Material and Methods**

### 96 **DNA methylation profiling**

97           Genome-wide DNA methylation was profiled on Illumina HumanMethylation450  
98           BeadChip (Illumina, San Diego, USA). Genomic DNA was extracted from primary cultures of  
99           melanocytes from 106 newborn males mainly of European descent as previously described<sup>6</sup>,  
100           and DNA methylation was measured according to Illumina's standard procedure at Cancer  
101           Genomics Research Laboratory (CGR), National Cancer Institute. Basic intensity QC was  
102           performed using the minfi R package<sup>27</sup>. Briefly, raw methylated and unmethylated intensities  
103           were background-corrected, and dye-bias-equalized to correct for technical variation in signal  
104           between arrays. The following criteria were applied to filter probes and samples: 1) Probes  
105           located on chrX and chrY were removed. 2) Probes including common SNPs with minor allele  
106           frequency (MAF) > 5% (1000 Genomes, phase 3, EUR) were removed. No melanoma GWAS  
107           loci were found within 1 Mbp of these SNPs. 3) Probes located in repetitive genomic regions  
108           (repeatmask hg19 database) were removed. 4) Probes with detection *P*-value >0.01 were  
109           marked as missing. Probes with a missing rate >5% were removed and samples with a missing  
110           rate >4% were removed. 5) Control samples and samples without matched genotyping data  
111           were removed. 6) For duplicated samples, the better one of the two was selected based on  
112           probe intensity, SNP call rate, and the percentage of missing probes. No batch effects or plating  
113           issues were identified across plates, wells, and barcode IDs based on the assessment of  
114           methylated and unmethylated intensities, failed samples, and beta distributions. Functional  
115           normalization implemented in the minfi R package<sup>27</sup> was used to calculate the final methylation  
116           levels (beta value) after normalization. In total, we retained 386,520 probes and 106 samples for  
117           the downstream meQTL analysis. In addition, we calculated the top 10 probabilistic estimation  
118           of expression residuals (PEER)<sup>28</sup> as the potential hidden covariates for QTL analysis.

119

## 120 **Quantification of RNA splicing**

121 RNA-Seq data of the same 106 melanocytes from our previous publication<sup>6</sup> were re-  
122 analyzed to quantify RNA splicing. The processed BAM files were used to create the junction  
123 files and intron clustering based on the instruction of LeafCutter<sup>29</sup>. The normalized quantification  
124 of 117,570 junctions was generated as the phenotype and 10 Principal Components (PCs) were  
125 included as covariates for splice QTL (sQTL) analysis.

126

## 127 **meQTL and sQTL detection**

128 *Cis*-meQTL and *cis*-sQTL analyses were performed using the same *cis*-QTL pipeline  
129 and the same processed genotype data (vcf format) as described in our previous *cis*-eQTL  
130 analysis<sup>6</sup>. Briefly, FastQTL was used to perform *cis*-QTL mapping<sup>30</sup>, and nominal *P*-values were  
131 generated for genetic variants located within  $\pm 1$  Mb of the transcription start sites (TSSs) for  
132 each probe or junction tested. For covariates of QTL analyses, we included 3 PCs inferred  
133 based on genotype data, and independent methylation variables (Pearson correlation coefficient  
134  $< 0.8$ ) from 10 PEER factors (meQTL), or independent splice junction usage variables (Pearson  
135 correlation  $< 0.8$ ) from 10 PCs (sQTLs). The beta distribution-adjusted empirical *P*-values from  
136 FastQTL were then used to calculate *q*-values<sup>31</sup>, and a false discovery rate (FDR) threshold of  $\leq$   
137 0.05 was applied to identify probes or junctions with a significant QTL (“meProbes” or  
138 “sJunctions”). We used a similar method as that for GTEx study (using FastQTL) to identify all  
139 significant variant-probe or junction pairs. In summary, a genome-wide empirical *P*-value  
140 threshold,  $p_t$ , was defined as the empirical *P*-value of the probe or junction closest to the 0.05  
141 *FDR* threshold.  $P_t$  was then used to calculate a nominal *P*-value threshold for each gene based  
142 on the beta distribution model of the minimum *P*-value distribution  $f(p_{min})$  obtained from the  
143 permutations for the probe or junction. Specifically, the nominal threshold was calculated as  $F^{-1}(p_t)$ ,  
144 where  $F^{-1}$  is the inverse cumulative distribution. For each probe or junction, variants with a  
145 nominal *P*-value below the probe or junction-level threshold were considered significant and

146 included in the final list of genome-wide significant *cis*-QTL variants. The effect (slope) of QTLs  
147 is relative to the alternative allele.

148

#### 149 ***trans*-meQTLs detection**

150 Identification of *trans*-meQTLs has been described previously by Shi and colleagues<sup>13</sup>.  
151 Prior to meQTL analysis, each methylation trait was regressed against batches and  
152 independent PEER factors based on methylation profiles. The regression residuals were then  
153 quantile-normalized to the standard normal distribution  $N(0,1)$  as traits. The genetic association  
154 testing was performed using tensorQTL<sup>32</sup>, adjusted for the top three PCA scores based on  
155 GWAS SNPs to control for potential population stratification. To identify the threshold for  
156 genome-wide significant *trans*-meQTLs, the following statistical steps were applied. For each  
157 CpG probe, the *trans* region was defined as being more than 5 Mb from the target CpG site in  
158 the same chromosome or on different chromosomes. For the  $n$ th methylation trait with  $m$  SNPs  
159 in the *trans* region, let  $(qn1, \dots, qnm)$  be the  $P$ -values for testing the marginal association  
160 between the trait and the  $m$  SNPs. Let  $pn = \min(qn1, \dots, qnm)$  be the minimum  $P$ -value for  $m$   
161 SNPs and converted  $pn$  into genome-wide  $P$ -value  $Pn$  by performing one million permutations  
162 for SNPs in the *trans* region. As a *cis* region is very short compared with the whole genome,  $Pn$   
163 computed based on SNPs in *trans* regions is very close to that based on permutations using  
164 genome-wide SNPs. Thus, we use the genome-wide  $P$ -value computed based on all SNPs to  
165 approximate  $Pn$ . Furthermore, all quantile-normalized traits follow the same standard normal  
166 distribution  $N(0,1)$ ; thus the permutation-based null distributions are the same for all traits. We  
167 then applied the Benjamini–Hochberg<sup>33</sup> procedure to  $(P1, \dots, PN)$  to identify *trans*-meQTLs by  
168 controlling FDR at 1%, which corresponded to a nominal  $P$ -value of  $1.03E-11$ .

169

#### 170 **TCGA SKCM meQTL analysis**

171 Four hundred and forty-four Skin Cutaneous Melanoma (SKCM) samples from The  
172 Cancer Genome Atlas (TCGA) with both genotype data and methylation data were included in  
173 our study. For genotype data, we collected our previously processed genotype data in vcf  
174 format<sup>6</sup>. The original raw intensity idat files from Human Methylation 450 array with matched  
175 genotype data were downloaded from NCI Genomic Data Commons Data Portal (GDC Legacy  
176 Archive, <https://portal.gdc.cancer.gov>). The same DNA methylation processing pipelines for  
177 melanocytes described above were applied to TCGA methylation data, which included 384,273  
178 high-quality probes for the downstream analysis. We selected the 3 PCs calculated from  
179 genotype data and uncorrected 10 Peer Factors from methylation data for the meQTL analysis.  
180 In addition, we adjusted the copy number alterations for each probe by including the  
181 segmentation's logR value as a covariate for meQTL analysis. The segmentation CNV data was  
182 calculated from the SNP array as TCGA level 3 dataset, which was collected from GDC portal.  
183 We followed the same melanocyte *cis*-meQTL analysis pipeline for the TCGA SKCM meQTL  
184 analysis. For *trans*-meQTL in TCGA SKCM, we only tested the association of significant  
185 melanocyte *trans*-meQTLs and applied a similar genome-wide *P*-value threshold (1.03E-11)  
186 between SNPs and distant CpG Probes.

187

### 188 **Pairwise meQTL sharing between primary melanocytes and TCGA SKCM**

189 To test the sharing of all significant SNP-CpG probe pairs of our melanocyte *cis*-  
190 meQTLs with those identified in TCGA SKCM, we calculated pairwise  $\pi_1$  statistics, where  $\pi_1$  is  
191 the proportion of all genome-wide significant meQTLs (using a threshold of  $FDR < 0.05$ ) from  
192 one dataset found to also be genome-wide significant in the other. We used QVALUE<sup>31</sup> to  
193 calculate  $\pi_1$ , which indicates the proportion of true positives. A higher  $\pi_1$  value indicates an  
194 increased replication of meQTLs.

195



## 196 **Multi-QTL colocalization**

197           Melanoma GWAS summary statistics from a meta-analysis of 36,760 clinically confirmed  
198 and self-reported cutaneous melanoma cases were collected from a recent study<sup>4</sup>, which  
199 included 54 significant loci with 68 independent SNPs. All study participants provided informed  
200 consent reviewed by IRBs, including 23andMe participants with online informed consent and  
201 participation, under a protocol approved by the external AAHRPP-accredited IRB, Ethical &  
202 Independent Review Services (E&I Review). We performed multi-QTL colocalization analyses  
203 among GWAS, eQTL, meQTL, and sQTL datasets. HyPrColoc<sup>34</sup> was used to perform  
204 colocalization analysis with the default parameters: prior.1 (1e-4) and prior.2 (0.980). We only  
205 considered genome-wide significant QTL SNPs within +/-250kb of the GWAS lead SNP of each  
206 locus. Phased LD matrices from 1000 Genomes, phase 3 (EUR), and sample overlap correction  
207 were used for the colocalization analysis. We started with 2-traits analyses comparing GWAS  
208 and each QTL one at a time: GWAS-eQTL, GWAS-meQTL, and GWAS-sQTL. Then, we  
209 performed 3-trait (G-e-m, G-s-e, G-s-m) and 4-trait (G-e-m-s) analyses. For each matrix (trait x  
210 SNP), one gene/probe per trait is selected at a time. Any matrix (trait x SNP) from 2,3,4-trait  
211 analyses is dropped if there are less than 50 SNPs. The colocalization events showing the  
212 consistent number of tested traits and colocalizing traits were included as the final result. For  
213 sensitivity analysis, we performed a similar multi-QTL colocalization with the stricter prior.2  
214 parameter in HyPrColoc: 0.99 and 0.995.

215

## 216 **Imputed methylome-wide association study**

217           We performed an imputed methylome-wide association study (MWAS) by predicting the  
218 function/molecular phenotypes into GWAS using the same melanoma meta-analysis as for the  
219 multi-QTL colocalisation<sup>4</sup> and methylation data from both TCGA SKCM and melanocyte data.  
220 TWAS FUSION<sup>35</sup>, which was originally designed for transcriptome-wide association studies  
221 (TWAS), was adapted to perform the MWAS analysis. To summarize, we first collected the

222 summary statistics without any significance thresholding. We then computed functional weights  
223 from our melanocyte methylation data one CpG Probe at a time. Probes that failed to pass a  
224 heritability check (minimum heritability  $P$ -value of 0.01) were excluded from the further analysis.  
225 A *cis*-locus was restricted to 50kb on either side of the CpG Probe boundary. For melanocyte  
226 data, from 386,520 probes meeting basic quality control, 21,252 probes passed the heritability  
227 check and were included as MWAS weights for association analysis using the melanoma  
228 GWAS summary stats and 1000 Genome, phase3 (EUR) LD reference. For the MWAS results,  
229 a genome-wide significance cutoff (MWAS  $P$ -value  $< 0.05/\text{number of probes tested}$ ) was  
230 applied.

231

### 232 **eQTL/meQTL mediation analysis**

233 A workflow (**Figure S9**) was applied to identify the potentially colocalized eQTL-meQTL  
234 pairs sharing a common causal variant followed by mediation and partial correlation analysis as  
235 originally described by Pierce and colleagues<sup>17</sup>. To identify candidate eQTL-meQTL pairs, we  
236 first restricted the meQTL analysis to lead SNPs (eSNPs) for each eGene from eQTL results  
237 and significant CpG probes (meProbes) from meQTL results to re-identified *cis*-meQTLs to  
238 these eSNPs. To reduce the redundant associations with the same SNP linking to a cluster of  
239 CpGs, we pruned our list of CpG probes by keeping only the CpGs whose lead meSNP had the  
240 highest LD with a lead eSNP. As a result, we identified each eGene paired with only one  
241 meCpG (eGene-meCpG pair), whose lead meSNP was in the strongest LD with the eSNP. In  
242 our melanocyte data, there were a total of 2,374 eGene-meCpG pairs showing association with  
243 a common SNP and available for colocalization analysis. HyPrColoc<sup>34</sup> was used to perform  
244 colocalization analysis with the parameter  $\text{prior.1} = 1e-4$ . A total of 841 potentially “colocalized”  
245 eQTL-meQTL pairs (including 296 common SNPs) were selected for downstream mediation  
246 analyses based on the posterior probability of a common causal variant (CCV) above 0.8.

247 For mediation analysis, we used our melanocyte data on 106 genotyped individuals with  
248 both expression and methylation data to conduct tests of mediation for two hypothesized  
249 pathways: (1) SNP -> Methylation -> Expression or “SME”, and (2) SNP -> Expression ->  
250 Methylation or “SEM”; For all lead eSNPs, the *cis*-eQTL association was re-tested with  
251 adjustment for methylation of the CpG (and vice versa). The difference between the beta  
252 coefficients before and after adjustment for the *cis* gene was expressed as the “proportion of the  
253 total effect that is mediated” (i.e., % mediation), calculated as  $|(\beta_{unadj} - \beta_{adj})|/|\beta_{unadj}|$ , with  
254  $\beta_{unadj}$  and  $\beta_{adj}$  representing the total effect and the direct effect of the variant, respectively<sup>17,36</sup>.  
255 All regression analyses were adjusted for PCs inferred from expression or methylation data. The  
256 Sobel *P*-value for mediation was calculated using the same formula as in previous  
257 publications<sup>17,37</sup>.

258 We also performed the partial correlation analysis using the co-localized eQTL-meQTL  
259 pairs in our 106 melanocyte datasets. The Pearson correlation coefficients between the  
260 expression gene and the methylation probe were calculated after adjusting for expression and  
261 methylation PCs, respectively. Both the expression gene and methylation probe were regressed  
262 on the lead eSNP, and the residuals from these regressions were obtained as the expression  
263 and methylation values that lack the phenotypic variance due to the effect of the SNP.  
264 Correlation coefficients before and after SNP adjustment were compared to identify the eGene-  
265 meCpG pairs showing the partial correlation. To explore the extent to which partial correlation  
266 could be due to secondary, co-localized causal variants affecting both the expression trait and  
267 the CpG being analyzed, we also searched for secondary association signals for the eGene-  
268 meCpG pairs with partial correlation  $P < 0.05$  and colocalization CCV  $> 0.8$ . For 73 pairs  
269 meeting these criteria, we adjusted for both the primary and secondary lead eSNP-meSNP.  
270 After this adjustment, 63 pairs were still significant ( $P > 0.05$ ) (**Table S9**).

271 To explore the potential influence of CpG probes exclusion on methylation-expression  
272 mediation analysis, we pulled the 5,575 methylation probes that were dropped from melanocyte

273 meQTL analysis. These are probes with SNPs of MAF>0.05 in EUR (minfi function  
274 dropLociWithSnps using SNPs parameters: “SBE” and “CpG”) that were excluded to avoid  
275 technical artifacts affecting genotype effect on allelic methylation levels, as suggested by other  
276 studies<sup>12,38</sup>. Among them, 583 unique methylation probes overlapped (within +/-1bp) with 594  
277 unique melanocyte eQTL SNPs (595 unique probe-SNP pairs and 925 unique probe-SNP-gene  
278 trios). When overlaid with melanoma GWAS-melanocyte eQTL colocalization results (using  
279 HyPrColoc), none of the 594 eQTL SNPs overlapped with melanoma GWAS colocalized SNPs  
280 (posterior probability>0.8) or their proxies ( $r^2 > 0.8$ ). Ten of the 594 eQTL SNPs were the  
281 strongest eQTL SNPs of an eGene (eSNP). Predicted allelic transcription factor binding for  
282 these ten SNPs was searched on Haploreg v4.1  
283 (<https://pubs.broadinstitute.org/mammals/haploreg/haploreg.php>).

284

### 285 **Identifying *cis*-mediators for *trans*-meQTLs**

286 To explore the mediation of *trans*-meQTL by *cis*-eQTL (e.g. of potential transcription  
287 factors), mediation analysis was performed by applying eQTLMAPT<sup>39</sup> to the primary  
288 melanocytes’ meQTL data. Only trios with evidence of both *cis*-eQTL and *trans*-meQTL  
289 association were included. To detect the mediation effects, 152 candidate trios were derived  
290 from significant *cis*-eQTL and *trans*-meQTL associations (based on *FDR* < 0.05 and < 0.01,  
291 respectively). We performed the mediation analysis with an adaptive permutation scheme and  
292 GPD approximation with parameters  $N = 10,000$  and  $\alpha = 0.05$  for all candidate trios. All PEER  
293 factors included in eQTL and meQTL analyses and other covariates (top 3 genotype PCs) were  
294 adjusted and trios with suggestive mediation were reported using mediation *P*-value threshold <  
295 0.05.

296

## 297 **Enrichment of melanoma GWAS variants in meQTLs**

298 We generated quantile-quantile (QQ) plots to evaluate whether melanoma GWAS  
299 variants were enriched in meQTLs of melanocyte or TCGA SKCM. To minimize the impact of  
300 linkage disequilibrium (LD) on the enrichment analysis, we performed LD-pruning to identify  
301 independent SNPs among all the GWAS variants using PLINK v1.90 beta<sup>40</sup> ( $r^2 = 0.1$  and window  
302 size 500 kb). QQ plots were made using  $P$ -values ( $-\log_{10}$ ) of melanoma GWAS<sup>4</sup> for non-meQTL  
303 SNPs v.s. meQTL SNPs after LD-pruning. Deviation from the 45-degree line indicates that  
304 melanoma GWAS SNPs are enriched in meQTL SNPs.

305

## 306 **Functional annotation of CpGs and meQTLs**

307 Functional annotation of CpGs and meQTLs has been described previously<sup>12</sup>. We  
308 annotated 10 genomic features of CpGs, including CpGs located in CpG Islands, low or high  
309 CpG regions, promoters, enhancers, gene bodies, 3 prime untranslated regions (3'UTR),  
310 5'UTR, 0–200 bases upstream of transcription start sites (TSS200), and 201–1500 bases  
311 upstream of transcription start sites (TSS1500). Hypergeometric tests were used to evaluate if  
312 the identified *cis*- and *trans*-meQTL CpGs showed enrichment for CpGs annotated with those  
313 genomic features. The significance threshold was defined by a fold change of  $>1.2$  or  $<0.8$  and  
314 a Bonferroni-corrected threshold  $P < 0.05/10 = 0.005$ .

315 In addition, we determined the distribution of genome-wide meCpG probes based on  
316 their genomic position in relation to CpG islands and nearby genes. Enrichment fold change  
317 was calculated as the ratio of the fraction of meQTLs overlapping with genomic annotations v.s.  
318 the fraction of randomly selected SNPs overlapping with the genomic annotations. 'epitools' was  
319 used for this analysis.

320

## 321 **Motif enrichment analysis for *trans*-meQTL**

322 Enrichment of known sequence motifs among trans-CpGs was assessed using the  
323 PWMEnrich package in R (<https://bioconductor.org/packages/PWMEnrich/>). One hundred and  
324 thirty-one CpG probes with *trans*-meQTL association with rs12203592 were selected for  
325 enrichment analysis. For PWMEnrich, the 101-bp sequence around each interrogated CpG site  
326 was used, and unique 2kb promoters in humans were used as the pre-compiled background  
327 set.

328

## 329 **IRF4 ChIP-sequencing in melanoma cells**

330 To identify genome-wide binding sites of IRF4 in melanoma cells, we performed ChIP-  
331 sequencing against eGFP tagged IRF4. We generated an inducible eGFP tagged IRF4 cell line  
332 in 501Mel cells by cloning eGFP tagged IRF4 downstream of the tetracycline response element  
333 in a PiggyBac transposon system<sup>41</sup>. We used the Tetracycline-ON system where the expression  
334 of eGFP-IRF4 can be induced by adding doxycycline or tetracycline. For ChIP experiments, the  
335 eGFP-tagged IRF4 expressing 501Mel cells were grown on ten 10 cm dishes, and 1 ug/ml of  
336 doxycycline was added for the induction. Chromatin immunoprecipitation was performed  
337 according to Palomero and colleagues<sup>42</sup> as follows: Twenty million cells were crosslinked with  
338 0.4% formaldehyde for 10 minutes at room temperature, quenched by 0.125M glycine for 5 min  
339 at RT and chromatin was then sheared by 5 min sonication (25% amplitude, 30sec off and 30  
340 sec on) using a probe sonicator (Epishear, Active Motif). Immunoprecipitation was performed  
341 with Protein G Dynabeads (Life Technologies), with a total of 10 µg of anti-GFP antibody (3E6  
342 from Molecular Probes, #A-11120). The bead-bound immune complexes were washed five  
343 times with wash buffer (50M Hepes pH 7.6, 1mM EDTA, 0.7% Na-DOC, 1% NP-40, and 0.5M  
344 LiCl) and once with TE. Crosslinking was reversed by washing the immune-complexes and  
345 sonicated lysate input in elution buffer (50mM Tris pH 8, 10mM EDTA, 1% SDS) overnight at 65  
346 °C. Then the samples were treated with 0.2 µg/µL of RNase A for 1 hour at 37°C followed by

347 treatment with 0.2 µg/µL proteinase K for 2 hours at 55°C. DNA was extracted from the samples  
348 using phenol:chloroform. CHIP-seq DNA libraries were prepared from the purified CHIP DNA  
349 and input DNA using the NEBNext CHIP-seq Library Prep Kit (E6200, NEB). Libraries were  
350 prepared from 8-15 ng of fragmented CHIP or input DNA, which were amplified with 10 PCR  
351 cycles. The amplified libraries were purified using Agencourt AMPure XP beads (A63881,  
352 Beckman Coulter) and then were paired-end sequenced. Approximately 30 million raw reads  
353 were mapped of each sample to the human hg19 reference genome using Bowtie 2<sup>43</sup>. The  
354 aligned reads were then used as an input for peak calling using MACS<sup>44</sup>.

355

### 356 **IRF4 knockdown and RNA sequencing**

357 The human melanoma cell line 501mel was cultured in RPMI-1640 cell culture medium  
358 (Gibco) supplemented with 10% FBS (Gibco) in a humid incubator at 5% CO<sub>2</sub> and 37°C. IRF4  
359 was knocked down in three biological replicates of 501mel cells by transfecting the cells using  
360 Lipofectamine (RNAiMAX, Thermo Fisher) with siRNA (Silencer Select #AM16708, Thermo  
361 Fisher) for 48 hours. Cells were harvested and RNA was extracted using Quick-RNA Mini prep  
362 (#R1055, ZYMO Research). IRF4 knockdown was verified by RT-qPCR before generating  
363 sequencing libraries. RNA-sequencing was performed on the NovaSeq 6000 system and ~150  
364 million raw reads were mapped to human transcriptome GRCh38 using Kallisto<sup>45</sup> and differential  
365 expression analysis was performed using Sleuth<sup>46</sup>.

## 366 **Results**

### 367 **Identification of cell-type-specific melanocyte meQTLs**

368 To establish a melanocyte-specific meQTL dataset, we assessed DNA methylation  
369 levels in cultured melanocytes from 106 newborn males mainly of European descent using  
370 Illumina 450K methylation arrays (**Material and Methods**). We then performed *cis*-meQTL

371 analysis assessing variants within +/-1Mb of each CpG probe and identified 13,274 unique CpG  
372 probes (meProbes) with 1,497,502 significant *cis*-meQTLs before LD-pruning (**Table S1A**).  
373 Most *cis*-meQTL variants are clustered near CpGs (< ~100kb), where variants closer to the  
374 target CpGs tended to have lower *P*-values and larger effect sizes (**Figure S1**). Among 13,274  
375 meProbes, 29% were located in CpG islands and 34% in CpG-adjacent regions (shores and  
376 shelves), with the rest (38%) away from CpG islands (Open Seas) (**Figure S2**). meProbes are  
377 also mainly located in or near the gene body (73% are within 1500bp of Transcription Start  
378 Sites, UTRs, 1st exon, or gene body), and the rest (27%) in intergenic regions. Compared to  
379 non-meProbes, meProbes are most enriched in Open Seas and intergenic regions, while most  
380 depleted in islands and 1st exons. At the variant level, *cis*-meQTLs are also significantly  
381 depleted in CpG islands and gene promoter regions (**Figure S3**).

382 To supplement these meQTLs, as well as melanocyte-specific eQTLs we previously  
383 identified <sup>6</sup>, we also performed mRNA splice junction QTL (sQTL) analysis using previously  
384 generated RNAseq data from the same melanocytes through which we identified 7,054 unique  
385 splice junctions with 887,233 *cis*-sQTLs (not LD-pruned) (**Table S1A**). Together with our  
386 previous eQTL findings, we identified a total of 1,039,047 non-overlapping eQTL/meQTL/sQTL  
387 variants in melanocytes, a substantial proportion (40.4%) of which are only detected by meQTL  
388 (**Figure S4**). Of meQTL variants, 27.4% and 21.8% were also detected as eQTL and sQTL,  
389 respectively, and 13.3% were significant for all three QTLs. Among eQTL variants, 42.3% and  
390 36.7% were also detected as meQTL and sQTL, respectively. Among sQTLs, 44.2% and 40.5%  
391 displayed an overlap with eQTLs and meQTLs, respectively.

392

### 393 **Multi-QTL colocalization improved melanoma GWAS annotation**

394 To explore the contribution of cell-type specific meQTL and other QTLs to melanoma  
395 GWAS annotation, we first performed multi-trait colocalization using HyPrColoc<sup>34</sup> using  
396 summary data from a recent melanoma GWAS meta-analysis of 36,760 histologically confirmed



397 and self-reported cases<sup>4</sup>. Melanocyte meQTLs colocalized with melanoma GWAS signals  
398 (posterior probability > 0.8) at 13 of 54 loci, while sQTLs displayed colocalization at two loci  
399 (**Figure 1, Table S1B, S2**). Together, at least one of three QTL types colocalized with  
400 melanoma GWAS signal at 21 of 54 melanoma loci (39%), which is a considerable improvement  
401 from the 12 loci (22%) explained by eQTLs alone using the same approach (HyPrColoc; note  
402 that this percentage differs slightly from 16% reported in Landi *et al*<sup>4</sup>, where eCAVIAR<sup>47</sup> was  
403 used for colocalization). Sensitivity analysis, adjusting the second prior from 0.98 to 0.99 and  
404 0.995, indicated that 80% (61/76) and 64% (49/76) of colocalization events were still detected  
405 for the same traits at posterior probability > 0.8, respectively (**Table S2**). These data  
406 demonstrated that cell-type-specific multi-QTL colocalization could explain close to half of  
407 melanoma GWAS loci and that methylation QTL is the largest contributor colocalizing with 24%  
408 of the known loci.

409 Further, multi-QTL colocalization identified four loci where more than one cell-type-  
410 specific QTL trait colocalizes with the melanoma GWAS signal (**Figure 1, Table S2**). For three  
411 loci, both eQTL and meQTL colocalized with the GWAS signal (*MSC/RP11-383H13.1*,  
412 *OCA2/AC090696.2*, and *MX2*; **Figure S5A-C**). At the fourth locus, all three QTL traits, including  
413 eQTL (*CDH1*), meQTL (meCpG near *CDH1*), and sQTL (splice junction in *CDH3* gene), were  
414 colocalized with the GWAS signal (**Figure S5D**). For the locus near *MX2*, colocalization  
415 identified rs398206 as a common causal variant for eQTL, meQTL, and melanoma risk,  
416 validating our previous findings identifying this variant as a functional *cis*-regulatory variant  
417 regulating *MX2*<sup>48</sup>. Here, meQTLs for two CpG probes in the gene body display the same allelic  
418 direction of effect as that of *MX2* eQTL, where higher methylation levels are correlated with the  
419 allele associated with increased *MX2* expression, consistent with the observations that DNA  
420 methylation in the gene body is positively correlated with gene expression. *OCA2* is a known  
421 pigmentation gene and, within this locus, the lead GWAS SNP located in the *HERC2* gene,  
422 rs12913832, was identified as a common causal variant for eQTL, meQTL, and melanoma risk

423 through the expression of both *OCA2* and an antisense *HERC2* transcript, *AC090696.2*. These  
424 results are consistent with the previous findings that a melanocyte-specific enhancer  
425 encompassing rs12913832 regulates *OCA2* expression through an allele-preferential long-  
426 range chromatin interaction<sup>49</sup>. The *MSC/RP11-383H13.1* locus was initially identified as a novel  
427 locus by melanoma TWAS using our melanocyte eQTL dataset<sup>6</sup> and data from a prior  
428 melanoma GWAS meta-analysis<sup>5</sup>, with this locus being subsequently identified as a genome-  
429 wide significant GWAS locus by the larger melanoma GWAS<sup>4</sup>. Our multi-QTL colocalization  
430 indicated that DNA methylation is also involved in this locus in mediating melanoma risk. Finally,  
431 for the *CDH1/3* locus, rs4420522 in the intron of *CDH1* was identified as a common likely causal  
432 variant for an eQTL (*CDH1*), meQTL (*CDH1* gene body open sea CpG), sQTL (*CDH3*), and  
433 melanoma risk. Notably, the eQTL (*CDH1*) and sQTL (*CDH3*) are for two different homologous  
434 genes encoding E-cadherin and P-cadherin, respectively, that are located adjacent to each  
435 other. Same variants being an eQTL for one gene and sQTL for another has been shown for a  
436 subset of GTEx sQTLs in a recent study<sup>50</sup>, but whether they share candidate causal variants  
437 was not clear. Here we show an example of a common candidate causal variant affecting gene  
438 expression or splicing of two different genes in the same cell type.

439

#### 440 **Imputed MWAS identified novel melanoma-associated loci**

441 Given that meQTLs colocalize for a sizable proportion of melanoma GWAS signals, we  
442 further performed an imputed methylome-wide association study (MWAS)<sup>26</sup> using the  
443 melanocyte methylation data. Adopting the approach used for transcriptome-wide association  
444 studies (TWAS)<sup>35</sup>, we trained models of genetically regulated CpG methylation in our  
445 melanocyte dataset (**Material and Methods**) and tested the association of imputed methylation  
446 levels and melanoma risk using the summary statistics from melanoma GWAS. Significant  
447 MWAS was observed for 159 meCpGs (Bonferroni-corrected MWAS  $P < 0.05/21,252$  tested  
448 probes), which overlapped 29 known genome-wide significant melanoma GWAS loci and further

449 nominated 10 potentially “new” loci (**Table S3A, S4**). Among these new loci, six overlapped with  
450 GWAS loci previously identified in a pleiotropic analysis between melanoma and nevus count  
451 and/or melanoma and hair color traits, or loci identified by melanocyte TWAS (*NIPAL3*,  
452 *NOTCH2*, *HDAC4*, *AKAP12*, *CBWD*, and *SYNE2*; **Table S4**)<sup>4</sup>, suggesting that the MWAS  
453 approach effectively identifies bona fide susceptibility loci found via complementary approaches.  
454 Besides these six loci, the other four loci included CpG probes on or near *SPOPL*,  
455 *NUMA1/LRTOMT*, *SNORD41/TNPO2*, *EPB41L1*, and *RPRD1B*. These results demonstrated  
456 the potential of MWAS to nominate candidate susceptibility genes that are missed in the single-  
457 variant analysis.

458 Consistent with our comparisons between eQTL and meQTL colocalization, MWAS and  
459 TWAS together explained 54% of melanoma GWAS loci, which is a considerable improvement  
460 from 28% of GWAS loci by TWAS alone (**Table S3A**)<sup>4</sup>. Combined with the findings from  
461 colocalization analyses, melanocyte eQTL and meQTL together explained 63% of melanoma  
462 GWAS loci (**Table S3B**). TWAS, MWAS, and multi-QTL colocalization cross-validated each  
463 other in 18/54 (33%) of GWAS loci, where one or more approaches pointed to the same  
464 affected genes (**Figure 2**). Of the 16 genes that were supported by both TWAS and MWAS  
465 (gene assignment is based on CpG probes within 1.5kb of TSS, 5' UTR, 1st exon, gene body,  
466 or 3' UTR of a gene), 6 genes displayed the same direction of effect relative to melanoma risk  
467 (Z-scores in the same direction), while 5 genes displayed the opposite direction of effect (**Table**  
468 **S4**). However, the other 5 genes were matched with CpG probes displaying the effect in both  
469 directions. These data suggest potential co-regulation of gene expression and promoter CpG  
470 methylation in these loci, contributing to melanoma risk.

471 Through both colocalization and TWAS/MWAS, melanocyte eQTL and meQTL  
472 nominated a total of 107 unique candidate melanoma susceptibility genes. Ingenuity Pathway  
473 Analysis (<http://www.ingenuity.com/index.html>) identified biological pathways enriched by these  
474 genes including those in melanin biosynthesis (L-dopachrome biosynthesis, L-DOPA

475 degradation, eumelanin biosynthesis), apoptosis (apoptosis signaling, Myc-mediated apoptosis  
476 signaling, retinoic acid-mediated apoptosis signaling), autophagy, adhesion junction signaling  
477 (epithelial adherens junction signaling, remodeling of epithelial adherens junctions), and  
478 melanoma-specific signaling (melanoma signaling, Wnt/beta-catenin signaling), among others  
479 (**Table S5A**). Of these, melanoma-specific signaling and apoptosis pathways are strengthened  
480 by adding meQTL compared to a similar analysis using only eQTL in melanocytes and skin  
481 tissues<sup>4</sup>. Notably, upstream regulator analysis identified the transcription factor MITF as the  
482 most significant regulator of these genes (**Table S5B**), which is consistent with its known role as  
483 the master regulator of melanocyte lineage<sup>51</sup> and a melanoma susceptibility gene<sup>52,53</sup>. Together,  
484 these data demonstrated that meQTL from the cell-type of disease origin is complementary to  
485 eQTL data and greatly increases the power to nominate candidate causal genes.

486

#### 487 **Melanocyte meQTLs are substantially preserved in melanomas**

488         Given the large contribution of melanocyte meQTLs underlying melanoma GWAS loci,  
489 we further asked if and how well the genetic control of CpG methylation in the melanocytic  
490 lineage is preserved in malignant melanomas. For this, we performed a meQTL analysis of 444  
491 cutaneous melanomas from TCGA using data generated from the same 450K methylation array  
492 platform and using the same analytic approach, except for adding regional genomic copy  
493 number as a covariate (**Material and Methods**). First, we identified 3,794,446 genome-wide  
494 significant *cis*-meQTLs (not LD-pruned) for 15,308 unique meProbes from TCGA melanomas,  
495 which are higher numbers than those observed from melanocytes (15% more meProbes). When  
496 meProbes were compared between datasets, 45.9% of melanocyte meProbes were also  
497 significant in melanomas, while 39.8% of melanoma meProbes were observed in melanocytes  
498 (**Figure S6A**). Melanocyte meQTL preservation in melanoma is even higher at the gene level,  
499 showing 65% preservation when meProbes are assigned to genes based on their position  
500 relative to gene bodies or promoters (**Figure S6B**). The effect sizes of the best meQTL for each

501 meProbe were highly correlated for 6,087 common meProbes in both groups ( $P$ -value < 2.2e-  
502 16;  $R = 0.74$ ), with 88.4% of them displaying the same direction of effect (**Figure S7**). We  
503 further calculated the true positive rates ( $\pi_1$ ) of top *cis*-meQTLs ( $FDR < 0.05$ ) from melanocytes  
504 by examining their  $P$ -value distributions in melanoma meQTLs, and vice versa. The true positive  
505 rate ( $\pi_1$ ) was 0.825 and 0.822 for melanocyte meQTLs in melanomas and melanoma meQTLs  
506 in melanocytes, respectively, displaying a high level of meQTL preservation between two  
507 datasets. Notably, normal to tumor preservation was much less at the eGene level, where only  
508 12.7% of melanocyte eQTL genes were preserved in melanomas (**Figure S6A**), in contrast to  
509 the high preservation rate of meQTL. Among 635 preserved eGenes, 230 (36%) were  
510 associated with one or more preserved eProbes.

511 We then investigated whether melanoma-specific meQTL corroborates melanoma  
512 GWAS annotation through colocalization and MWAS. Melanoma meQTLs colocalized with the  
513 melanoma GWAS signal at 11 of 54 loci (20%) (**Table S6**), and melanoma MWAS overlapped  
514 with 19 GWAS loci (35%) and further identified six new loci (**Table S7**). Among these were loci  
515 only explained by melanoma meQTL but not by melanocyte QTLs; melanoma meQTLs uniquely  
516 annotated five GWAS loci (CpG probes near *PPARGC1B*, *OBFC1*, and *SHANK3*) and identified  
517 four novel MWAS loci (**Figure 3; Table S8**). Through colocalization and MWAS, melanoma  
518 meQTL explained 46% (25/54) of melanoma GWAS loci, which, despite the >4-times larger  
519 sample size and an overall higher number of identified meProbes, is considerably less than that  
520 by melanocyte meQTL (56%). Consistent with this observation, melanoma risk-associated  
521 variants are more enriched for melanocyte meQTLs than for melanoma meQTLs (**Figure S8**).  
522 Thus, these data demonstrate that genetically regulated CpG methylation observed in the  
523 melanocyte-lineage is substantially preserved in tumors. Nevertheless, these data also show  
524 that cancer susceptibility reflected in GWAS signals is better explained by DNA methylation  
525 from normal homogeneous cells of disease origin than by that from heterogeneous tumor  
526 tissues, even with considerably larger sample size. Overall, melanocyte multi-QTL and

527 melanoma meQTL collectively explain 39 melanoma risk-associated loci, representing 72% of  
528 all known genome-wide significant loci.

529

### 530 **Genetic control of DNA methylation and gene expression in melanocytes**

531 To investigate the genetic control of gene expression and DNA methylation in primary  
532 melanocytes beyond their contribution to melanoma risk, we sought to determine whether  
533 eQTLs and meQTLs more broadly share the same causal variants and whether one has a  
534 causal effect on the other. For this, we performed colocalization of eQTLs and meQTLs followed  
535 by mediation and partial correlation analysis as previously described by Pierce and colleagues  
536 <sup>17</sup> (**Figure S9**). We first took 4,886 unique eSNPs (strongest eQTL SNP for each eGene) from  
537 eQTL data and re-identified *cis*-meQTLs, limiting to these 4,886 SNPs and 13,274 meCpG  
538 probes (meProbes). After pruning overlapping meProbes, we identified 2,374 unique eGene-  
539 meProbe pairs linked by the same eSNP, 841 of which (35%) were colocalized at posterior  
540 probability > 0.8 using HyPrColoc (prior1 = 1e-4; prior2 = 0.95; **Material and Methods**). We  
541 then performed partial correlation analysis for those 841 eGene-meProbe pairs, of which 50  
542 (6%) displayed significant partial correlation after conditioning on the primary and the secondary  
543 independent variants ( $FDR < 0.05$ ), and 197 (23%) displayed correlation at a relaxed cutoff  
544 when conditioning on the primary variant ( $P < 0.05$ ) and 187 when conditioning on both the  
545 primary and the secondary variants. These data suggested a link between DNA methylation and  
546 gene expression beyond that through common causal variants (**Figure S10A; Table S9;**  
547 **Methods**). Next, we performed mediation analysis for 841 eGene-meProbe pairs to estimate  
548 the effect of SNP on gene expression mediated by DNA methylation and vice versa. The results  
549 indicated that 32 unique eGene-meProbe pairs (4%) displayed significant mediation either of  
550 methylation on expression (25 pairs;  $FDR < 0.05$  & % mediation > 0) or of expression on  
551 methylation (25 pairs;  $FDR < 0.05$  & % mediation > 0), where 18 pairs were significant under  
552 both hypotheses (**Figure 4; Table S10**). All 32 significantly mediated pairs were included in 197

553 pairs displaying a marginal partial correlation ( $P < 0.05$ ) (**Figure S10B**). Among 197 SNP-gene-  
554 probe trios, 69% (135 trios) displayed an opposite allelic direction of effect between meQTL and  
555 eQTL, while 31% (62 trios) displayed the same allelic direction of effect.

556 Our data suggested that a considerable proportion (~35%; 841 of 2374) of eGene-  
557 meProbe pairs may share a causal variant between eQTL and meQTL in melanocytes. A subset  
558 (up to 23%; 197 of 841) of those displayed some evidence of methylation/expression co-  
559 regulation, where a majority displays an opposite directional effect. Ingenuity Pathway Analysis  
560 of 197 genes displaying significant mediation ( $FDR < 0.05$ ) or partial correlation ( $P < 0.05$ )  
561 between melanocyte meQTL and eQTL highlighted pathways involving immune response and  
562 UVA-Induced MAPK Signaling among others (**Table S11**). Notably, 841 potentially colocalizing  
563 eGene-meProbe pairs were significantly enriched in melanocyte eGenes that are preserved in  
564 malignant melanomas compared to non-preserved eGenes (Fisher's exact,  $P = 9.44e-07$ ; OR =  
565 1.68). We do not observe the same type of enrichment in preserved meProbes compared to  
566 non-preserved meProbes ( $P = 0.608$ ; OR = 1.04). However, colocalizing eGene-meProbe pairs  
567 are significantly enriched in genes on or near the preserved meProbes compared to those with  
568 non-preserved meProbes ( $P = 3.36e-05$ ; OR = 1.58). These data suggest that genetic influence  
569 on potentially co-regulated DNA methylation and gene expression in primary melanocytes tend  
570 to be well maintained during malignant transformation.

571 Although conventional meQTL analyses using array-based methylation measurement  
572 exclude SNPs overlapping CpGs themselves, SNPs on CpG sites could potentially have a high  
573 impact on allelic methylation and target gene expression. Among all the SNPs in CpG, 10.6%  
574 were significant eQTLs in melanocytes. Of these, we focused on 10 CpG SNPs that are the  
575 strongest eQTL for an eGene (eSNPs) in our melanocyte dataset (**Table S12**). A majority of  
576 these CpG probes were located in promoter or enhancer regions near TSS. While the allelic  
577 changes from C or G to A or T are considered to abolish the CpG sites preventing methylation,  
578 some of them were predicted to create transcription factor binding sites in exchange. In an

579 example of cg16139068, a CpG probe near the TSS of *OGDHL*, an allelic change from CpG to  
580 CpA (rs61846889) dramatically increases predicted binding affinity for Ahr::Arnt::HIF1 complex  
581 (Haploreg v4.1 position weight matrix from [doi:10.1093/nar/gkt1249](https://doi.org/10.1093/nar/gkt1249)). rs61846889 is also a  
582 significant eQTL for *OGDHL* across multiple tissues as well as melanocytes, including sun-  
583 exposed skin ( $P = 1.2e-20$ , normalized effect size relative to A allele = 0.62; GTEx v8). These  
584 data hint at a hypothesis that CpG SNPs could lead to allelic gene expression by directly  
585 affecting DNA methylation while simultaneously affecting transcription factor binding. Together  
586 our data provide insights into an intersection of eQTL and meQTL in genetic control of gene  
587 expression and DNA methylation in melanocyte biology.

588

### 589 **Melanocyte *trans*-meQTLs highlight an IRF4 transcriptional regulatory network**

590 Next, we performed *trans*-meQTL analysis of melanocytes, testing SNPs outside the +/-  
591 5Mb boundary of each CpG probe or on a different chromosome. We observed 332 unique CpG  
592 probes with one or more significant *trans*-meQTL at  $FDR < 0.01$  (**Table S13; Figure 5**). For  
593 65% (215 of 332) of those CpG probes, the best *trans*-meQTL variant was also a significant *cis*-  
594 eQTL in melanocytes. Among all the significant *trans*-meQTL variants, only one variant was a  
595 hot spot *trans*-meQTL for more than 10 CpGs across the genome. Namely, rs12203592, a *cis*-  
596 eQTL for *IRF4* gene expression<sup>6</sup>, was a *trans*-meQTL for 131 CpGs (40%). rs12203592 was  
597 previously shown as a functional variant in melanocyte-lineage that regulates the expression of  
598 the IRF4 transcription factor<sup>54</sup>. In our previous study of melanocyte eQTLs, we identified  
599 rs12203592 as a significant *cis*-eQTL of *IRF4* as well as a genome-wide significant *trans*-eQTL  
600 for four different genes, *TMEM140*, *MIR3681HG*, *PLA1A*, and *NEO1*<sup>6</sup>, a subset of which  
601 displayed significant mediation by *IRF4 cis*-eQTL. In the current study, rs12203592 was  
602 identified as a *trans*-meQTL for two CpG probes (cg14710552 and cg07972322) located in  
603 *TMEM140* and one CpG probe (cg04330122) located in *PLA1A*, consistent with our findings in  
604 *trans*-eQTL. Furthermore, 95.4% (125 of 131) of rs12203592 *trans*-meQTL-CpG pairs displayed



605 a positive effect size relative to the alternative T allele, where lower *IRF4* expression level is  
606 associated with higher methylation levels at the target CpGs (**Table S14**). These results are  
607 similar to the observation in blood samples, where *trans*-meQTL hotspots displayed consistent  
608 allelic directions<sup>11,12</sup>. Our findings are consistent with the hypothesis that altered expression of  
609 *IRF4* by the *cis*-eQTL SNP, rs12203592, affects allelic methylation changes of those CpGs on  
610 or near multiple downstream target genes in melanocytes.

611 We then asked if any *cis*-eQTL variant is driving *trans*-meQTL (i.e. via allelic expression  
612 of transcription factors and the subsequent effect on methylation of downstream targets) by  
613 performing mediation analysis using eQTLMAPT<sup>39</sup>. For this, we tested 152 *cis*-eQTL variant:*cis*-  
614 eQTL gene:*trans*-meQTL probe trios (*FDR* < 0.05 for *cis*-meQTL and < 0.01 for *trans*-meQTL),  
615 of which 24 trios displayed significant mediation at *P* < 0.05 (**Table S15; Figure S11**). An  
616 overwhelming majority of the significant trios (92%; 22 of 24) included rs12203592, where *cis*-  
617 eQTL of *IRF4* expression mediates the *trans*-meQTL effect of 18 putative target genes, further  
618 supporting *IRF4*-mediated target gene regulation in melanocytes. Notably, among 18 putative  
619 *IRF4* target genes was a melanoma-risk associated gene, *MX2* (MX Dynamin Like GTPase 2).  
620 *MX2* is an interferon-alpha-stimulated gene (ISG) with conventional roles in the innate immune  
621 response against HIV infection but was previously shown to have a melanocyte-lineage-specific  
622 function in promoting melanoma formation<sup>48</sup>. Similarly, *IRF4* was originally known as one of the  
623 IFN-regulatory factors with roles in B and T lymphocytes<sup>55-57</sup> but also has melanocyte-lineage  
624 specific roles in pigmentation traits<sup>54</sup>, which is consistent with its association with pigmentation  
625 traits<sup>58,59</sup>, nevus counts<sup>60</sup>, and melanoma risk<sup>4,60</sup>. These data suggest a melanocyte-specific  
626 functional interaction between two melanoma-risk associated genes, *IRF4* and *MX2*.

627 To further investigate if the targets of rs12203592 *trans*-meQTL are regulated by direct  
628 *IRF4* binding, we performed *IRF4* ChIP-seq using 501mel melanoma cells ectopically  
629 expressing *IRF4*. Among 131 significant *trans*-meQTL target CpGs (*FDR* < 0.01) of *IRF4 cis*-  
630 meQTL SNP rs12203592, 54 (41.2%) CpGs overlapped within +/-100bp of *IRF4* ChIP-seq

631 peaks (peaks detected at  $P < 1e-5$  in at least one replicate) (**Table S14**). We also performed a  
632 motif enrichment analysis for the target CpGs of rs1223592 *trans*-meQTL using PWMEnrich,  
633 which showed that the motifs for IRF family proteins ranked at the top, with the IRF4 motif being  
634 the second most significantly enriched motif ( $P = 3.09e-14$ ) (**Table S16; Fig S12**). We further  
635 examined differentially expressed genes in 501mel cells with *IRF4* knockdown. Among 804  
636 differentially expressed genes upon IRF4 knockdown ( $P < 0.01$  and  $|\log_2(\text{fold change})| > 1$ ), 7  
637 genes overlapped with 8 target CpG probes of rs12203592 *trans*-meQTL (*VPS13B*, *NCKAP5*,  
638 *E2F5*, *RGMB*, *SMG6*, *MYH10*, *MAP2K6*) (Enrichment OR = 2.8,  $P$ -value = 0.1), while none of  
639 them are near ChIP-seq peaks. These results indicate that *IRF4* is a melanocyte-specific  
640 transcriptional regulator of multiple target genes that are under tight genetic control. The data  
641 also supports the hypothesis that allelic methylation changes in *trans* reflect altered gene  
642 expression driven by transcription factor binding, rather than methylation changes themselves  
643 driving expression changes.

644 Finally, we tested if significant melanocyte *trans*-meQTLs were also present in  
645 melanomas. Among 15,179 *trans*-meQTL variant-meProbe pairs found in melanocytes ( $FDR <$   
646 0.01), 11,714 were present in TCGA SKCM dataset. rs12203592 was not present in the TCGA  
647 dataset and could not be tested. Of the tested variant-meProbe pairs, 9,868 (65% of 15,179 or  
648 84% of 11,714) including all 332 melanocyte *trans*-meProbes were significant in melanomas ( $P$   
649  $< 1e-11$ ; equivalent to  $FDR < 0.01$ ). A strong correlation of *trans*-meQTL effect sizes was  
650 observed between melanocyte and melanoma datasets (Pearson R = 0.71;  $P < 2.2e-16$ ) (**Fig**  
651 **S13**). These data indicated that melanocyte *trans*-meQTLs are highly preserved in malignant  
652 melanomas.

## 653 Discussion

654 To date, meQTL studies have been mainly performed in blood and blood cell  
655 types<sup>11,12,14–20</sup>, tumor tissues<sup>24,25</sup>, and/or normal bulk tissues<sup>13,21–23</sup>. However, cell-type-specific  
656 meQTL studies using the cell of origin for many diseases and traits have been largely lacking.  
657 Our study presents a rare example of a single cell type meQTL dataset accompanied by  
658 matching expression QTL data. In this study, we explored the roles of cell-type-specific meQTL  
659 in characterizing disease-associated genomic variants as well as understanding their roles in  
660 gene expression regulation. Using multi-trait colocalization and MWAS, we demonstrated that a  
661 melanocyte meQTL generated from a dataset of moderate sample size ( $n = 106$ ) provides  
662 substantial power to detect melanoma-associated CpG probes. Comparison of meQTLs  
663 between melanocytes and malignant melanomas revealed that melanocyte meQTLs are far  
664 better preserved than eQTLs in melanomas. Together, melanocyte multi-QTL and melanoma  
665 meQTL nominated molecular phenotypes underlying 72% of known genome-wide significant  
666 melanoma GWAS loci (and identified multiple novel loci), which is higher than conventional  
667 eQTL colocalization-based findings<sup>1</sup>. Pathway analyses of these genes highlighted melanoma-  
668 and melanocyte lineage-specific signaling, as well as a master regulator of melanocyte lineage,  
669 MITF, which was not apparent from the analyses using only eQTL. Melanocyte meQTL also  
670 extended our knowledge on genetic regulation of gene expression involving DNA methylation.  
671 eQTL-meQTL colocalization/mediation analyses and *trans*-meQTL hotspot analysis highlighted  
672 the roles of transcription factors in allelic methylation patterns including those through lineage-  
673 specific transcription factors and target genes.

674 Melanocyte *trans*-meQTL analysis identified a melanocyte-specific regulatory network  
675 involving a transcription factor, IRF4. Previous studies suggested that *trans*-meQTL hotspots  
676 could affect the expression of nearby transcription factors (i.e. *cis*-eQTL), which might be  
677 reflected on the allelic methylation of their potential binding sites across the genome<sup>11–13</sup>. In our

678 study, a *trans*-meQTL hotspot SNP, rs12203592, displayed multiple lines of support for  
679 regulation by the IRF4 transcription factor. IRF4 is primarily known as an interferon regulatory  
680 factor highly expressed in lymphocytes and blood cells, but rs12203592 is located in a  
681 melanocyte-specific enhancer element and seems to be regulated through a melanocyte-  
682 lineage specific transcriptional program affecting pigmentation phenotypes<sup>54</sup>. Consistent with  
683 this observation, two large blood *trans*-meQTL studies using thousands of samples did not  
684 identify *trans*-meQTL hotspots through rs12203592<sup>11,12</sup>. Among the target CpGs of rs12203592  
685 *trans*-meQTLs is the recently identified melanoma susceptibility gene, *MX2*, which also has  
686 pleiotropic roles in both melanoma promotion and immune response, hinting at potential  
687 functional interaction between *IRF4* and *MX2* in melanomagenesis. By combining eQTL,  
688 meQTL, and mediation analysis as well as ChIP-seq and knockdown analyses, our study  
689 presents a unique example of a cell-type-specific transcriptional network mediated by a multi-  
690 function transcription factor. Notably, the IRF4-mediated regulatory network in melanocytes was  
691 marginally detectable by *trans*-eQTL<sup>6</sup>, but *trans*-meQTL analysis in the current study revealed  
692 orders of magnitude larger plausible downstream targets (4 genes at *FDR* < 0.1 vs. 131 CpGs  
693 at *FDR* < 0.01). These data suggest that CpG methylation might better represent the dynamic  
694 status of transcription factor binding-related chromatin changes than gross gene expression  
695 changes do.

696 Our study provides one of the few formal comparisons of meQTLs and eQTLs between  
697 tumor tissues and cells of tumor origin. We show that a substantial proportion (45.9%) of  
698 genome-wide significant meCpG probes in melanocytes are preserved in melanomas. This is a  
699 much larger overlap compared to that of eGenes observed in our previous eQTL study using the  
700 same datasets, where only 12.7% of melanocyte eGenes were preserved in TCGA melanomas.  
701 Loss of the majority of normal tissue eQTLs in tumors was also observed in prostate tumors  
702 although this was not examined genome-wide<sup>21</sup>. Our comparisons of eQTL and meQTL from  
703 the same samples suggest that genetic control of lineage-specific CpG methylation is largely

704 still detectable even in the presence of presumably high variation of methylation in tumor  
705 genomes. Our eQTL-meQTL colocalization analysis also indicated that a substantial portion of  
706 tested genes in melanocytes are potentially co-regulated with DNA methylation through  
707 common genetic variants. Importantly, these co-regulated genes and CpG probes are likely to  
708 remain under genetic control during malignant transformation even in the presence of somatic  
709 events. Consistent with this idea, melanocyte *trans*-meQTLs (presumably regulated through  
710 transcription factor binding) were preserved in melanomas at an even higher level (65%) than  
711 *cis*-meQTLs. These data provide an insight into our understanding of gene expression  
712 regulation in tumors, where both heritable and tumor-specific events contribute to the total  
713 transcriptome profile.

714         Although meQTL is powerful, sensitive, and reliable, assigning the effector genes to  
715 significant meCpG is still challenging in the absence of colocalizing eQTL support.  
716 Colocalization approaches with an improved detection power might help identify those left  
717 undetected with the current approaches. Additionally, some of the GWAS-colocalizing meQTLs  
718 without concurrent eQTL support might reflect loci poised to be connected with allelic  
719 differences in gene expression upon proper stimulations (e.g. UV exposure), which actively  
720 proliferating cultured melanocytes cannot recapitulate.

721         In conclusion, our study demonstrated the utility of cell-type-specific meQTL in GWAS  
722 annotation and provided insights into melanocyte-specific gene expression regulation involving  
723 DNA methylation.

724

## 725 **Supplemental Data**

726 Supplemental Data include thirteen figures and sixteen tables.

727

## 728 **Declaration of Interests**

729 The authors declare no competing interests.

730

## 731 **Acknowledgments**

732 This work has been supported by the Intramural Research Program (IRP) of the Division of  
733 Cancer Epidemiology and Genetics, National Cancer Institute, US National Institutes of Health.

734 This work was also supported by grants from the Research Fund of Iceland to ES (184861 and  
735 207067), a grant from the University of Iceland Doctoral Grants Fund to RD, and a postdoctoral

736 grant from the University of Iceland Research Fund to BOE, as well as funding from Cancer

737 Research UK (programme award C588/A19167) and by the NIH (R01 CA83115). Genotyping

738 services were provided by the Center for Inherited Disease Research (CIDR). CIDR is fully

739 funded through a federal contract from the National Institutes of Health to The Johns Hopkins

740 University, contract number HHSN268201100011I. This work utilized the computational

741 resources of the NIH high-performance computational capabilities Biowulf cluster

742 (<http://hpc.nih.gov>). The results appearing here are in part based on data generated by the

743 TCGA Research Network (<http://cancergenome.nih.gov/>). We would like to thank members at

744 the National Cancer Institute Cancer Genomics Research Laboratory (CGR) for help with

745 sequencing efforts, Stacie Loftus and William Pavan from National Human Genome Research

746 Institute for the help with the melanocyte eQTL study, and Christopher Foley from the University

747 of Cambridge for the help with HyPrColoc analysis. We also thank all the cohorts, funders, and

748 investigators who contributed to the melanoma GWAS, acknowledged by Landi, 23andMe, and

749 colleagues, from which data was used towards fine-mapping. We would like to thank the

750 research participants and employees of 23andMe for making this work possible. The content of

751 this publication does not necessarily reflect the views or policies of the US Department of Health

752 and Human Services, nor does mention of trade names, commercial products, organizations

753 imply endorsement by the US government.

754

## 755 **Web Resources**

756 minfi: <https://bioconductor.org/packages/release/bioc/html/minfi.html>

757 FastQTL: <http://fastqtl.sourceforge.net/>

758 LeafCutter: <https://davidaknowles.github.io/leafcutter/>

759 tensorQTL: <https://github.com/broadinstitute/tensorqtl>

760 QVALUE: <https://bioconductor.org/packages/release/bioc/html/qvalue.html>

761 HyPrColoc: <https://github.com/jrs95/hyprcoloc>

762 TWAS FUSION: <http://gusevlab.org/projects/fusion/>

763 eQTLMAPT: <https://github.com/QidiPeng/eQTLMAPT>

764 PLINK: <https://www.cog-genomics.org/plink/>

765 PWMErich: <https://bioconductor.org/packages/PWMErich/>

766 epitools: <https://CRAN.R-project.org/package=epitools>

767 MACS: <https://github.com/macs3-project/MACS>

768 Kallisto: <https://pachterlab.github.io/kallisto/>

769 Sleuth: <https://pachterlab.github.io/sleuth/about>

770 Haploreg: <https://pubs.broadinstitute.org/mammals/haploreg/haploreg.php>

771 GDC Data Portal: <https://portal.gdc.cancer.gov>

772 Ingenuity Pathway Analysis: <http://www.ingenuity.com/index.html>

773

## 774 **Data and Code Availability**

775 The raw data of Illumina HumanMethylation450 BeadChip from 106 primary human

776 melanocytes have been submitted to the Gene Expression Omnibus (GEO) database under

777 accession code GSE166069; Melanocytes genotype data, RNA-Seq expression data, and all

778 meQTL association results are deposited in Genotypes and Phenotypes (dbGaP) under

779 accession phs001500.v1.p1. IRF4 ChIPseq and RNAseq data are deposited in GEO under  
780 accession code GSE167945. Data from the 2020 melanoma GWAS meta-analysis performed  
781 by Landi and colleagues were obtained from dbGaP (phs001868.v1.p1), with the exclusion of  
782 self-reported data from 23andMe and UK Biobank. The full GWAS summary statistics for the  
783 23andMe discovery data set will be made available through 23andMe to qualified researchers  
784 under an agreement with 23andMe that protects the privacy of the 23andMe participants.  
785 Please visit <https://research.23andme.com/collaborate/#dataset-access/> for more information  
786 and to apply to access the data. Summary data from the remaining self-reported cases are  
787 available from the corresponding authors of that manuscript (Matthew Law,  
788 Matthew.Law@qimrberghofer.edu.au; Mark Iles, M.M.Iles@leeds.ac.uk; and Maria Teresa  
789 Landi, [landim@mail.nih.gov](mailto:landim@mail.nih.gov)).

790

## 791 **References**

- 792 1. The GTEx Consortium (2020). The GTEx Consortium atlas of genetic regulatory effects  
793 across human tissues. *Science* 369, 1318–1330.
- 794 2. Kim-Hellmuth, S., Aguet, F., Oliva, M., Muñoz-Aguirre, M., Kasela, S., Wucher, V., Castel,  
795 S.E., Hamel, A.R., Viñuela, A., Roberts, A.L., et al. (2020). Cell type–specific genetic regulation  
796 of gene expression across human tissues. *Science* 369, eaaz8528.
- 797 3. Donovan, M.K.R., D’Antonio-Chronowska, A., D’Antonio, M., and Frazer, K.A. (2020). Cellular  
798 deconvolution of GTEx tissues powers discovery of disease and cell-type associated regulatory  
799 variants. *Nat. Commun.* 11, 955.
- 800 4. Landi, M.T., Bishop, D.T., MacGregor, S., Machiela, M.J., Stratigos, A.J., Ghiorzo, P.,  
801 Brossard, M., Calista, D., Choi, J., Fargnoli, M.C., et al. (2020). Genome-wide association meta-



- 802 analyses combining multiple risk phenotypes provide insights into the genetic architecture of  
803 cutaneous melanoma susceptibility. *Nat. Genet.* 52, 494–504.
- 804 5. Law, M.H., Bishop, D.T., Lee, J.E., Brossard, M., Martin, N.G., Moses, E.K., Song, F., Barrett,  
805 J.H., Kumar, R., Easton, D.F., et al. (2015). Genome-wide meta-analysis identifies five new  
806 susceptibility loci for cutaneous malignant melanoma. *Nat. Genet.* 47, 987–995.
- 807 6. Zhang, T., Choi, J., Kovacs, M.A., Shi, J., Xu, M., NISC Comparative Sequencing Program,  
808 Melanoma Meta-Analysis Consortium, Goldstein, A.M., Trower, A.J., Bishop, D.T., et al. (2018).  
809 Cell-type-specific eQTL of primary melanocytes facilitates identification of melanoma  
810 susceptibility genes. *Genome Res.* 28, 1621–1635.
- 811 7. Baylin, S.B., and Jones, P.A. (2011). A decade of exploring the cancer epigenome —  
812 biological and translational implications. *Nat. Rev. Cancer* 11, 726–734.
- 813 8. Kulis, M., Heath, S., Bibikova, M., Queirós, A.C., Navarro, A., Clot, G., Martínez-Trillos, A.,  
814 Castellano, G., Brun-Heath, I., Pinyol, M., et al. (2012). Epigenomic analysis detects widespread  
815 gene-body DNA hypomethylation in chronic lymphocytic leukemia. *Nat. Genet.* 44, 1236–1242.
- 816 9. Husquin, L.T., Rotival, M., Fagny, M., Quach, H., Zidane, N., McEwen, L.M., Maclsaac, J.L.,  
817 Kobor, M.S., Aschard, H., Patin, E., et al. (2018). Exploring the genetic basis of human  
818 population differences in DNA methylation and their causal impact on immune gene regulation.  
819 *Genome Biol.* 19, 222.
- 820 10. Birney, E., Smith, G.D., and Greally, J.M. (2016). Epigenome-wide Association Studies and  
821 the Interpretation of Disease -Omics. *PLoS Genet.* 12, e1006105.
- 822 11. Bonder, M.J., Luijk, R., Zhernakova, D.V., Moed, M., Deelen, P., Vermaat, M., van Iterson,  
823 M., van Dijk, F., van Galen, M., Bot, J., et al. (2017). Disease variants alter transcription factor

- 824 levels and methylation of their binding sites. *Nat. Genet.* *49*, 131–138.
- 825 12. Huan, T., Joehanes, R., Song, C., Peng, F., Guo, Y., Mendelson, M., Yao, C., Liu, C., Ma,  
826 J., Richard, M., et al. (2019). Genome-wide identification of DNA methylation QTLs in whole  
827 blood highlights pathways for cardiovascular disease. *Nat. Commun.* *10*, 4267.
- 828 13. Shi, J., Marconett, C.N., Duan, J., Hyland, P.L., Li, P., Wang, Z., Wheeler, W., Zhou, B.,  
829 Campan, M., Lee, D.S., et al. (2014). Characterizing the genetic basis of methylome diversity in  
830 histologically normal human lung tissue. *Nat. Commun.* *5*, 3365.
- 831 14. Richardson, T.G., Haycock, P.C., Zheng, J., Timpson, N.J., Gaunt, T.R., Davey Smith, G.,  
832 Relton, C.L., and Hemani, G. (2018). Systematic Mendelian randomization framework  
833 elucidates hundreds of CpG sites which may mediate the influence of genetic variants on  
834 disease. *Hum. Mol. Genet.* *27*, 3293–3304.
- 835 15. McClay, J.L., Shabalin, A.A., Dozmorov, M.G., Adkins, D.E., Kumar, G., Nerella, S., Clark,  
836 S.L., Bergen, S.E., Hultman, C.M., Magnusson, P.K.E., et al. (2015). High density methylation  
837 QTL analysis in human blood via next-generation sequencing of the methylated genomic DNA  
838 fraction. *Genome Biol.* *16*, 291.
- 839 16. Clark, A.D., Nair, N., Anderson, A.E., Thalayasingam, N., Naamane, N., Skelton, A.J.,  
840 Diboll, J., Barton, A., Eyre, S., Isaacs, J.D., et al. (2020). Lymphocyte DNA methylation  
841 mediates genetic risk at shared immune-mediated disease loci. *J. Allergy Clin. Immunol.* *145*,  
842 1438–1451.
- 843 17. Pierce, B.L., Tong, L., Argos, M., Demanelis, K., Jasmine, F., Rakibuz-Zaman, M., Sarwar,  
844 G., Islam, M.T., Shahriar, H., Islam, T., et al. (2018). Co-occurring expression and methylation  
845 QTLs allow detection of common causal variants and shared biological mechanisms. *Nat.*

846 Commun. 9, 804.

847 18. Banovich, N.E., Lan, X., McVicker, G., van de Geijn, B., Degner, J.F., Blischak, J.D., Roux,  
848 J., Pritchard, J.K., and Gilad, Y. (2014). Methylation QTLs are associated with coordinated  
849 changes in transcription factor binding, histone modifications, and gene expression levels. *PLoS*  
850 *Genet.* 10, e1004663.

851 19. Gaunt, T.R., Shihab, H.A., Hemani, G., Min, J.L., Woodward, G., Lyttleton, O., Zheng, J.,  
852 Duggirala, A., McArdle, W.L., Ho, K., et al. (2016). Systematic identification of genetic influences  
853 on methylation across the human life course. *Genome Biol.* 17, 61.

854 20. Chen, L., Ge, B., Casale, F.P., Vasquez, L., Kwan, T., Garrido-Martín, D., Watt, S., Yan, Y.,  
855 Kundu, K., Ecker, S., et al. (2016). Genetic Drivers of Epigenetic and Transcriptional Variation in  
856 Human Immune Cells. *Cell* 167, 1398–1414.e24.

857 21. Dai, J.Y., Wang, X., Wang, B., Sun, W., Jordahl, K.M., Kolb, S., Nyame, Y.A., Wright, J.L.,  
858 Ostrander, E.A., Feng, Z., et al. (2020). DNA methylation and cis-regulation of gene expression  
859 by prostate cancer risk SNPs. *PLoS Genet.* 16, e1008667.

860 22. Schulz, H., Ruppert, A.-K., Herms, S., Wolf, C., Mirza-Schreiber, N., Stegle, O., Czamara,  
861 D., Forstner, A.J., Sivalingam, S., Schoch, S., et al. (2017). Genome-wide mapping of genetic  
862 determinants influencing DNA methylation and gene expression in human hippocampus. *Nat.*  
863 *Commun.* 8, 1511.

864 23. Grundberg, E., Meduri, E., Sandling, J.K., Hedman, A.K., Keildson, S., Buil, A., Busche, S.,  
865 Yuan, W., Nisbet, J., Sekowska, M., et al. (2013). Global analysis of DNA methylation variation  
866 in adipose tissue from twins reveals links to disease-associated variants in distal regulatory  
867 elements. *Am. J. Hum. Genet.* 93, 876–890.

- 868 24. Heyn, H., Sayols, S., Moutinho, C., Vidal, E., Sanchez-Mut, J.V., Stefansson, O.A., Nadal,  
869 E., Moran, S., Eyfjord, J.E., Gonzalez-Suarez, E., et al. (2014). Linkage of DNA Methylation  
870 Quantitative Trait Loci to Human Cancer Risk. *Cell Rep.* 7, 331–338.
- 871 25. Gong, J., Wan, H., Mei, S., Ruan, H., Zhang, Z., Liu, C., Guo, A.-Y., Diao, L., Miao, X., and  
872 Han, L. (2019). Pancan-meQTL: a database to systematically evaluate the effects of genetic  
873 variants on methylation in human cancer. *Nucleic Acids Res.* 47, D1066–D1072.
- 874 26. Baselmans, B.M.L., Jansen, R., Ip, H.F., van Dongen, J., Abdellaoui, A., van de Weijer,  
875 M.P., Bao, Y., Smart, M., Kumari, M., Willemsen, G., et al. (2019). Multivariate genome-wide  
876 analyses of the well-being spectrum. *Nat. Genet.* 51, 445–451.
- 877 27. Aryee, M.J., Jaffe, A.E., Corrada-Bravo, H., Ladd-Acosta, C., Feinberg, A.P., Hansen, K.D.,  
878 and Irizarry, R.A. (2014). Minfi: a flexible and comprehensive Bioconductor package for the  
879 analysis of Infinium DNA methylation microarrays. *Bioinformatics* 30, 1363–1369.
- 880 28. Stegle, O., Parts, L., Piipari, M., Winn, J., and Durbin, R. (2012). Using probabilistic  
881 estimation of expression residuals (PEER) to obtain increased power and interpretability of gene  
882 expression analyses. *Nat. Protoc.* 7, 500–507.
- 883 29. Li, Y.I., Knowles, D.A., Humphrey, J., Barbeira, A.N., Dickinson, S.P., Im, H.K., and  
884 Pritchard, J.K. (2018). Annotation-free quantification of RNA splicing using LeafCutter. *Nat.*  
885 *Genet.* 50, 151–158.
- 886 30. Ongen, H., Buil, A., Brown, A.A., Dermitzakis, E.T., and Delaneau, O. (2016). Fast and  
887 efficient QTL mapper for thousands of molecular phenotypes. *Bioinformatics* 32, 1479–1485.
- 888 31. Storey, J.D., and Tibshirani, R. (2003). Statistical significance for genomewide studies. *Proc.*  
889 *Natl. Acad. Sci. U. S. A.* 100, 9440–9445.

- 890 32. Taylor-Weiner, A., Aguet, F., Haradhvala, N.J., Gosai, S., Anand, S., Kim, J., Ardlie, K., Van  
891 Allen, E.M., and Getz, G. (2019). Scaling computational genomics to millions of individuals with  
892 GPUs. *Genome Biol.* *20*, 228.
- 893 33. Benjamini, Y., and Hochberg, Y. (1995). Controlling the False Discovery Rate: A Practical  
894 and Powerful Approach to Multiple Testing. *J. R. Stat. Soc. Series B Stat. Methodol.* *57*, 289–  
895 300.
- 896 34. Foley, C.N., Staley, J.R., Breen, P.G., Sun, B.B., Kirk, P.D.W., Burgess, S., and Howson,  
897 J.M.M. (2021). A fast and efficient colocalization algorithm for identifying shared genetic risk  
898 factors across multiple traits. *Nat. Commun.* *12*, 764.
- 899 35. Gusev, A., Ko, A., Shi, H., Bhatia, G., Chung, W., Penninx, B.W.J.H., Jansen, R., de Geus,  
900 E.J.C., Boomsma, D.I., Wright, F.A., et al. (2016). Integrative approaches for large-scale  
901 transcriptome-wide association studies. *Nat. Genet.* *48*, 245–252.
- 902 36. Baron, R.M., and Kenny, D.A. (1986). The moderator–mediator variable distinction in social  
903 psychological research: Conceptual, strategic, and statistical considerations. *J. Pers. Soc.*  
904 *Psychol.* *51*, 1173–1182.
- 905 37. Sobel, M.E. (1987). Direct and Indirect Effects in Linear Structural Equation Models. *Sociol.*  
906 *Methods Res.* *16*, 155–176.
- 907 38. Smith, A.K., Kilaru, V., Kocak, M., Almli, L.M., Mercer, K.B., Ressler, K.J., Tyavsky, F.A.,  
908 and Conneely, K.N. (2014). Methylation quantitative trait loci (meQTLs) are consistently  
909 detected across ancestry, developmental stage, and tissue type. *BMC Genomics* *15*, 145.
- 910 39. Wang, T., Peng, Q., Liu, B., Liu, X., Liu, Y., Peng, J., and Wang, Y. (2019). eQTLMAPT:  
911 Fast and Accurate eQTL Mediation Analysis With Efficient Permutation Testing Approaches.

- 912 Front. Genet. *10*, 1309.
- 913 40. Purcell, S., Neale, B., Todd-Brown, K., Thomas, L., Ferreira, M.A.R., Bender, D., Maller, J.,  
914 Sklar, P., de Bakker, P.I.W., Daly, M.J., et al. (2007). PLINK: a tool set for whole-genome  
915 association and population-based linkage analyses. *Am. J. Hum. Genet.* *81*, 559–575.
- 916 41. Magnúsdóttir, E., Dietmann, S., Murakami, K., Günesdogan, U., Tang, F., Bao, S., Diamanti,  
917 E., Lao, K., Gottgens, B., and Azim Surani, M. (2013). A tripartite transcription factor network  
918 regulates primordial germ cell specification in mice. *Nat. Cell Biol.* *15*, 905–915.
- 919 42. Palomero, T., Lim, W.K., Odom, D.T., Sulis, M.L., Real, P.J., Margolin, A., Barnes, K.C.,  
920 O’Neil, J., Neuberg, D., Weng, A.P., et al. (2006). NOTCH1 directly regulates c-MYC and  
921 activates a feed-forward-loop transcriptional network promoting leukemic cell growth. *Proc. Natl.*  
922 *Acad. Sci. U. S. A.* *103*, 18261–18266.
- 923 43. Langmead, B., Trapnell, C., Pop, M., and Salzberg, S.L. (2009). Ultrafast and memory-  
924 efficient alignment of short DNA sequences to the human genome. *Genome Biol.* *10*, R25.
- 925 44. Zhang, Y., Liu, T., Meyer, C.A., Eeckhoute, J., Johnson, D.S., Bernstein, B.E., Nusbaum, C.,  
926 Myers, R.M., Brown, M., Li, W., et al. (2008). Model-based Analysis of ChIP-Seq (MACS).  
927 *Genome Biol.* *9*, R137.
- 928 45. Bray, N.L., Pimentel, H., Melsted, P., and Pachter, L. (2016). Near-optimal probabilistic  
929 RNA-seq quantification. *Nat. Biotechnol.* *34*, 525–527.
- 930 46. Pimentel, H., Bray, N.L., Puente, S., Melsted, P., and Pachter, L. (2017). Differential  
931 analysis of RNA-seq incorporating quantification uncertainty. *Nat. Methods* *14*, 687–690.
- 932 47. Hormozdiari, F., van de Bunt, M., Segrè, A.V., Li, X., Joo, J.W.J., Bilow, M., Sul, J.H.,

- 933 Sankararaman, S., Pasaniuc, B., and Eskin, E. (2016). Colocalization of GWAS and eQTL  
934 Signals Detects Target Genes. *Am. J. Hum. Genet.* 99, 1245–1260.
- 935 48. Choi, J., Zhang, T., Vu, A., Ablain, J., Makowski, M.M., Colli, L.M., Xu, M., Hennessey, R.C.,  
936 Yin, J., Rothschild, H., et al. (2020). Massively parallel reporter assays of melanoma risk  
937 variants identify MX2 as a gene promoting melanoma. *Nat. Commun.* 11, 2718.
- 938 49. Visser, M., Kayser, M., and Palstra, R.-J. (2012). HERC2 rs12913832 modulates human  
939 pigmentation by attenuating chromatin-loop formation between a long-range enhancer and the  
940 OCA2 promoter. *Genome Res.* 22, 446–455.
- 941 50. Garrido-Martín, D., Borsari, B., Calvo, M., Reverter, F., and Guigó, R. (2021). Identification  
942 and analysis of splicing quantitative trait loci across multiple tissues in the human genome. *Nat.*  
943 *Commun.* 12, 727.
- 944 51. Levy, C., Khaled, M., and Fisher, D.E. (2006). MITF: master regulator of melanocyte  
945 development and melanoma oncogene. *Trends Mol. Med.* 12, 406–414.
- 946 52. Yokoyama, S., Woods, S.L., Boyle, G.M., Aoude, L.G., MacGregor, S., Zismann, V.,  
947 Gartside, M., Cust, A.E., Haq, R., Harland, M., et al. (2011). A novel recurrent mutation in MITF  
948 predisposes to familial and sporadic melanoma. *Nature* 480, 99–103.
- 949 53. Bertolotto, C., Lesueur, F., Giuliano, S., Strub, T., de Lichy, M., Bille, K., Dessen, P.,  
950 d’Hayer, B., Mohamdi, H., Remenieras, A., et al. (2011). A SUMOylation-defective MITF  
951 germline mutation predisposes to melanoma and renal carcinoma. *Nature* 480, 94–98.
- 952 54. Praetorius, C., Grill, C., Stacey, S.N., Metcalf, A.M., Gorkin, D.U., Robinson, K.C., Van  
953 Otterloo, E., Kim, R.S.Q., Bergsteinsdottir, K., Ogmundsdottir, M.H., et al. (2013). A  
954 polymorphism in IRF4 affects human pigmentation through a tyrosinase-dependent

- 955 MITF/TFAP2A pathway. *Cell* *155*, 1022–1033.
- 956 55. Hagman, J. (2017). Critical Functions of IRF4 in B and T Lymphocytes. *J. Immunol.* *199*,  
957 3715–3716.
- 958 56. Shaffer, A.L., Emre, N.C.T., Romesser, P.B., and Staudt, L.M. (2009). IRF4: Immunity.  
959 Malignancy! Therapy? *Clin. Cancer Res.* *15*, 2954–2961.
- 960 57. Man, K., Miasari, M., Shi, W., Xin, A., Henstridge, D.C., Preston, S., Pellegrini, M., Belz,  
961 G.T., Smyth, G.K., Febbraio, M.A., et al. (2013). The transcription factor IRF4 is essential for  
962 TCR affinity-mediated metabolic programming and clonal expansion of T cells. *Nat. Immunol.*  
963 *14*, 1155–1165.
- 964 58. Morgan, M.D., Pairo-Castineira, E., Rawlik, K., Canela-Xandri, O., Rees, J., Sims, D.,  
965 Tenesa, A., and Jackson, I.J. (2018). Genome-wide study of hair colour in UK Biobank explains  
966 most of the SNP heritability. *Nat. Commun.* *9*, 5271.
- 967 59. Hysi, P.G., Valdes, A.M., Liu, F., Furlotte, N.A., Evans, D.M., Bataille, V., Visconti, A.,  
968 Hemani, G., McMahon, G., Ring, S.M., et al. (2018). Genome-wide association meta-analysis of  
969 individuals of European ancestry identifies new loci explaining a substantial fraction of hair color  
970 variation and heritability. *Nat. Genet.* *50*, 652–656.
- 971 60. Duffy, D.L., Zhu, G., Li, X., Sanna, M., Iles, M.M., Jacobs, L.C., Evans, D.M., Yazar, S.,  
972 Beesley, J., Law, M.H., et al. (2018). Novel pleiotropic risk loci for melanoma and nevus density  
973 implicate multiple biological pathways. *Nat. Commun.* *9*, 4774.
- 974



## 975 **Figure Titles and Legends**

### 976 **Figure 1. Melanocyte meQTL and multi-QTL colocalization improved melanoma GWAS**

977 **annotation.** Circos plot shows significant colocalization of melanoma GWAS loci (top) with  
978 eQTLs (right), sQTLs (bottom), and meQTLs (left). Colocalization between individual GWAS loci  
979 with multiple QTL traits are depicted by thicker, colored lines. GWAS loci are sorted by genomic  
980 coordinate and labeled with GWAS Lead SNPs with different colors; GWAS loci without any  
981 colocalizing-QTL are shown in black. QTL-associated gene symbols are also labeled with the  
982 same color as GWAS loci.

983

### 984 **Figure 2. Manhattan plots of melanocyte TWAS and MWAS results combined with**

985 **findings from eQTL and meQTL colocalization.** Each circle represents the TWAS or MWAS  
986 z-score of a gene (TWAS) or a CpG probe (MWAS) reflecting significance and the direction of  
987 effect relative to melanoma-risk (red: higher-level correlates with melanoma risk, blue: lower-  
988 level correlates with melanoma risk). Z-scores are shown on the y-axis, and chromosomal  
989 positions are on the x-axis. Green arrows: overlapping melanoma GWAS loci, orange arrows:  
990 new loci detected by TWAS or MWAS, green lines: colocalization of eQTL or meQTLs with  
991 melanoma GWAS loci. Gray dashed horizontal lines: significance threshold defined by  
992  $0.05/\text{number of probes or genes tested}$ .

993

### 994 **Figure 3. Summary of melanoma GWAS annotation using melanocyte multi-QTL and**

995 **TCGA-melanoma meQTL.** Known melanoma-associated loci (green circles) are defined by the  
996 findings from the newest melanoma meta-analysis. The new melanoma-associated loci (orange  
997 circles) are identified based on TWAS or MWAS analysis. Known and new GWAS loci are  
998 sorted by genomic coordinate. The top boxplot shows the total number of annotations per locus  
999 by multi-QTL colocalization (shown by QTL types) or TWAS/MWAS from melanocyte and TCGA

1000 datasets. The right marginal boxplot shows the percentage of GWAS loci annotated by each  
1001 approach (the percentage of the known loci is labeled in green).

1002

1003 **Figure 4. Mediation analysis of potentially colocalizing SNP-eGene-meProbe.** The volcano  
1004 plot shows the mediation analysis results for both the SEM (blue) and SME (orange) models.  
1005 Sobel P indicates the significance of the mediation analyses, where the red horizontal line  
1006 indicates  $FDR = 0.05$  cutoff. The mediation proportion shows the proportion of the total effect  
1007 (*cis*-meQTL) mediated by a *cis*-Gene (SEM) or the proportion of the total effect (*cis*-eQTL)  
1008 mediated by *cis*-Probes (SME). Mediation proportion can go in either direction, depending on  
1009 the directions of the effects of the confounders with the *cis*-mediator, the confounder on the *cis*-  
1010 gene or *cis*-Probes, and the non-reference allele on the *cis*-Probes or *cis*-Gene.

1011

1012 **Figure 5. Melanocyte trans-meQTL.** Circos plot shows the genome-wide significant *trans*-  
1013 meQTLs at  $FDR < 0.01$ . The yellow-green gradient spikes show a hotspot *trans*-meQTL SNP,  
1014 rs12203592, located at 6p25.3 that is associated with 131 CpG sites. Nearby genes of *trans*-  
1015 meQTL associated CpG sites are labeled outside the circos plot.

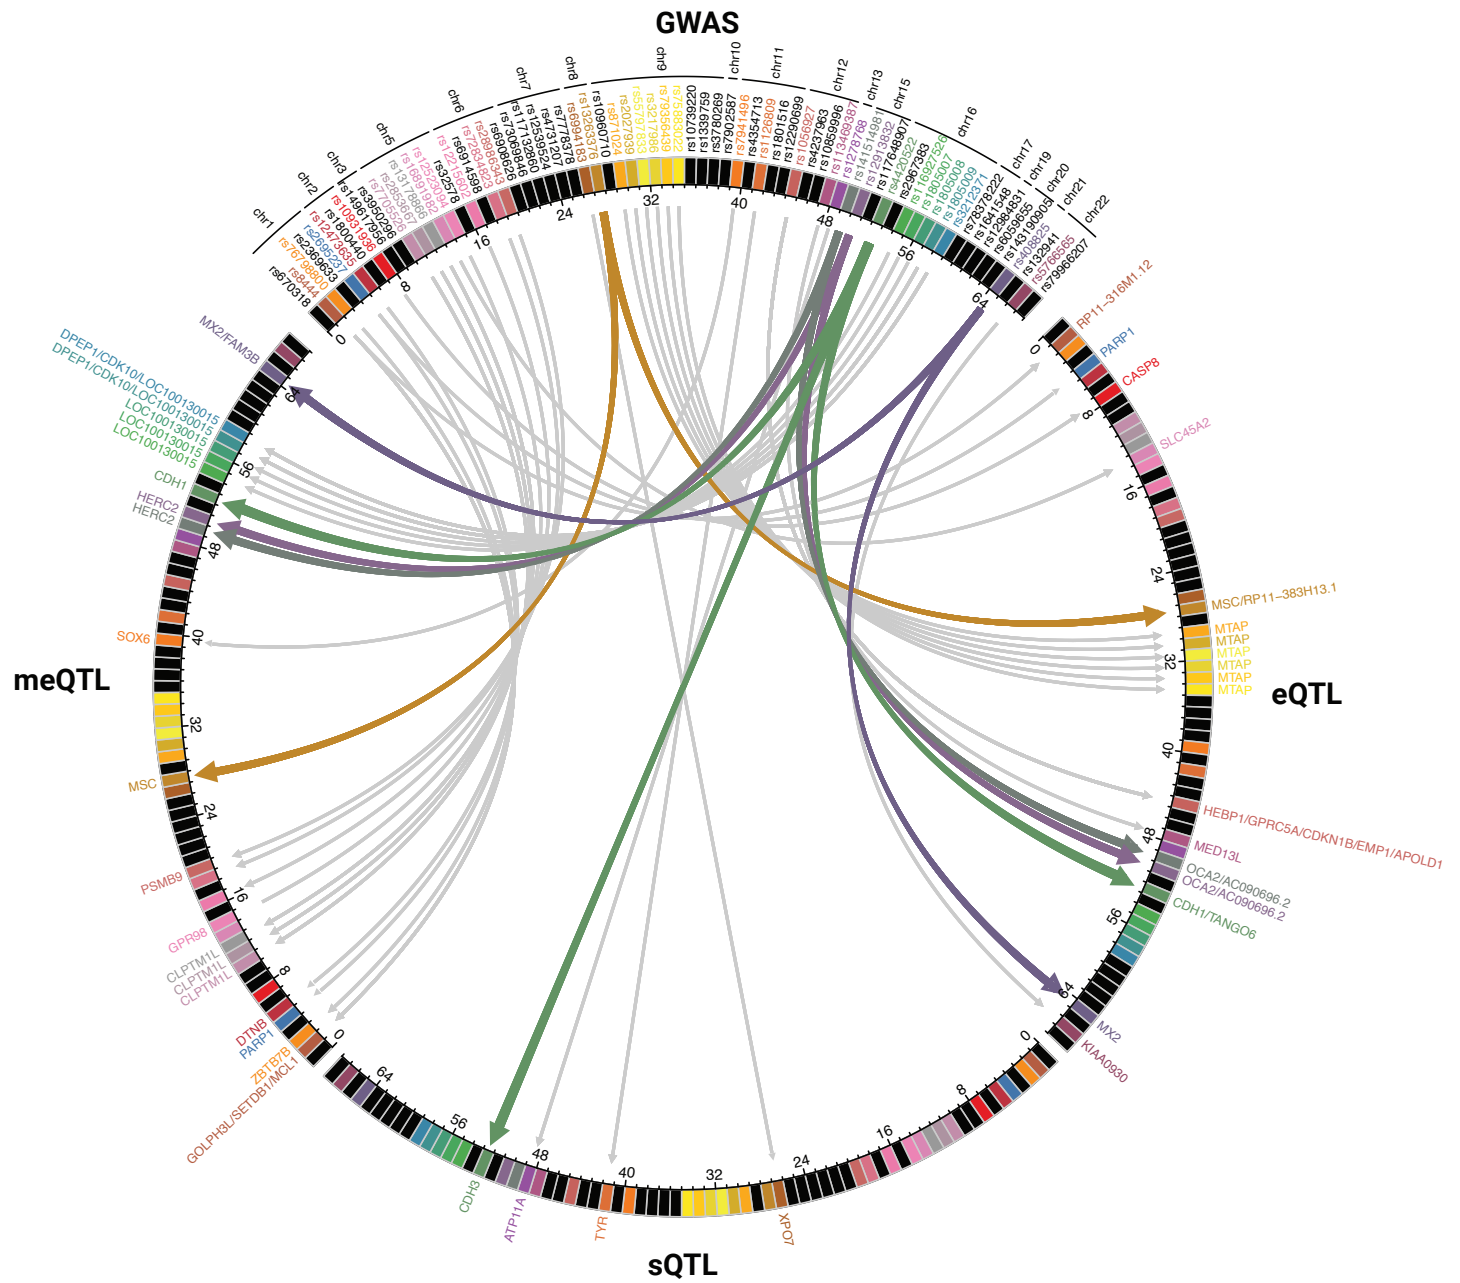

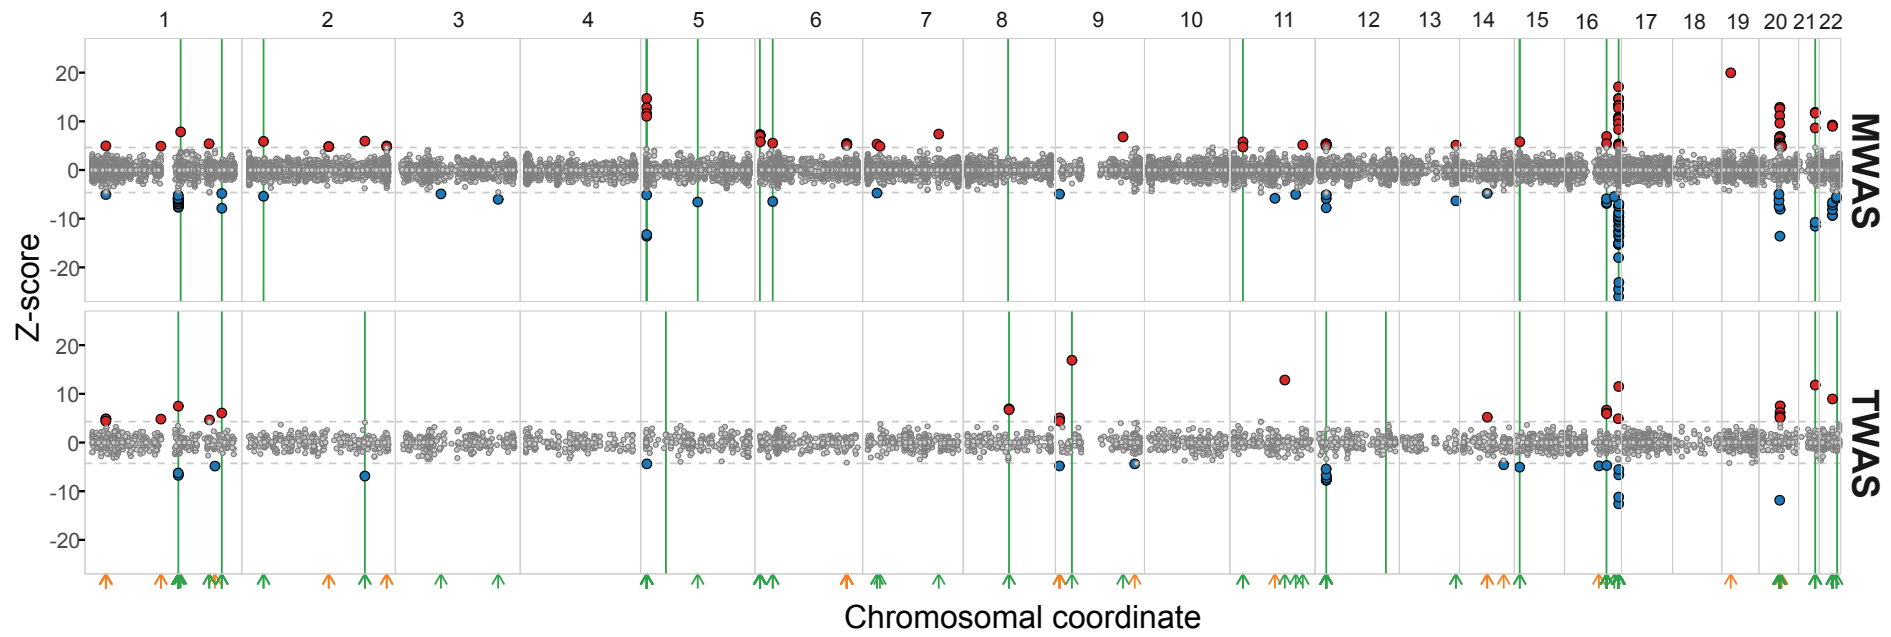

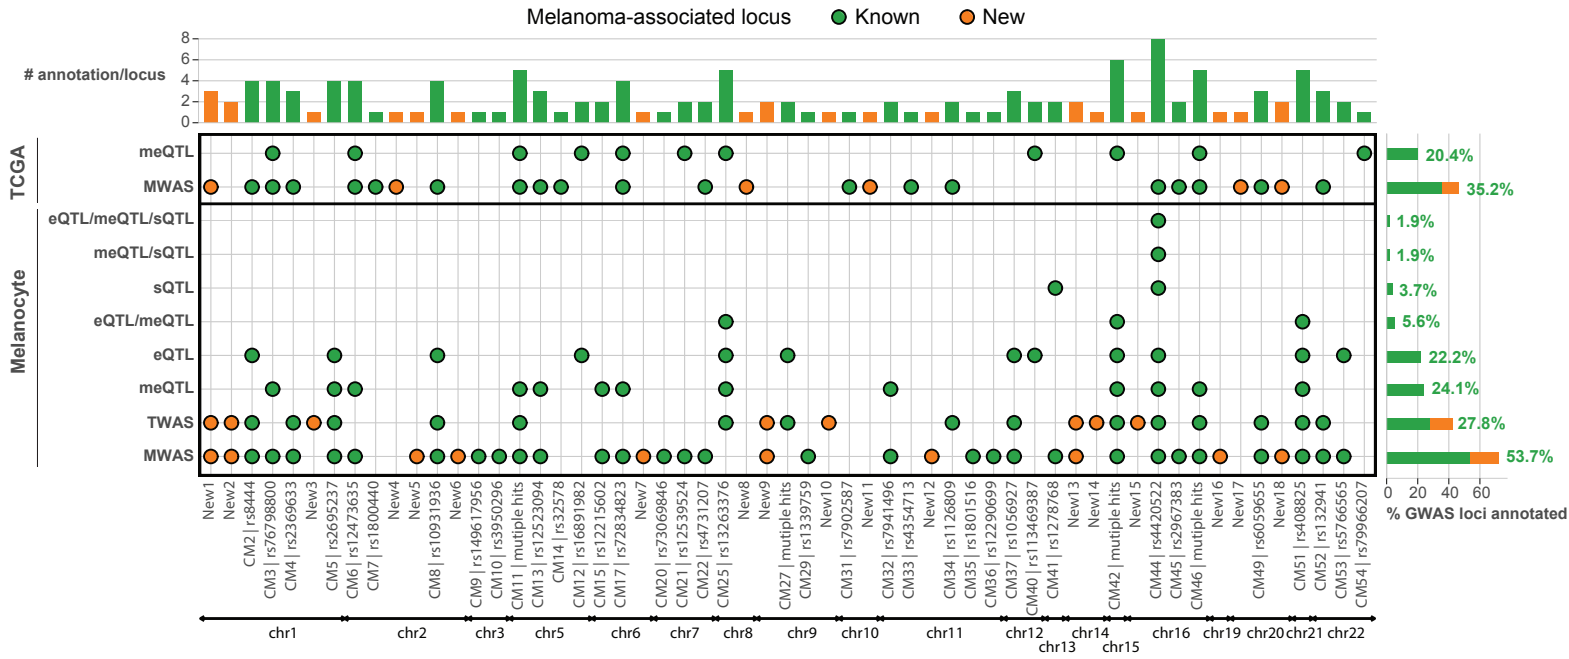

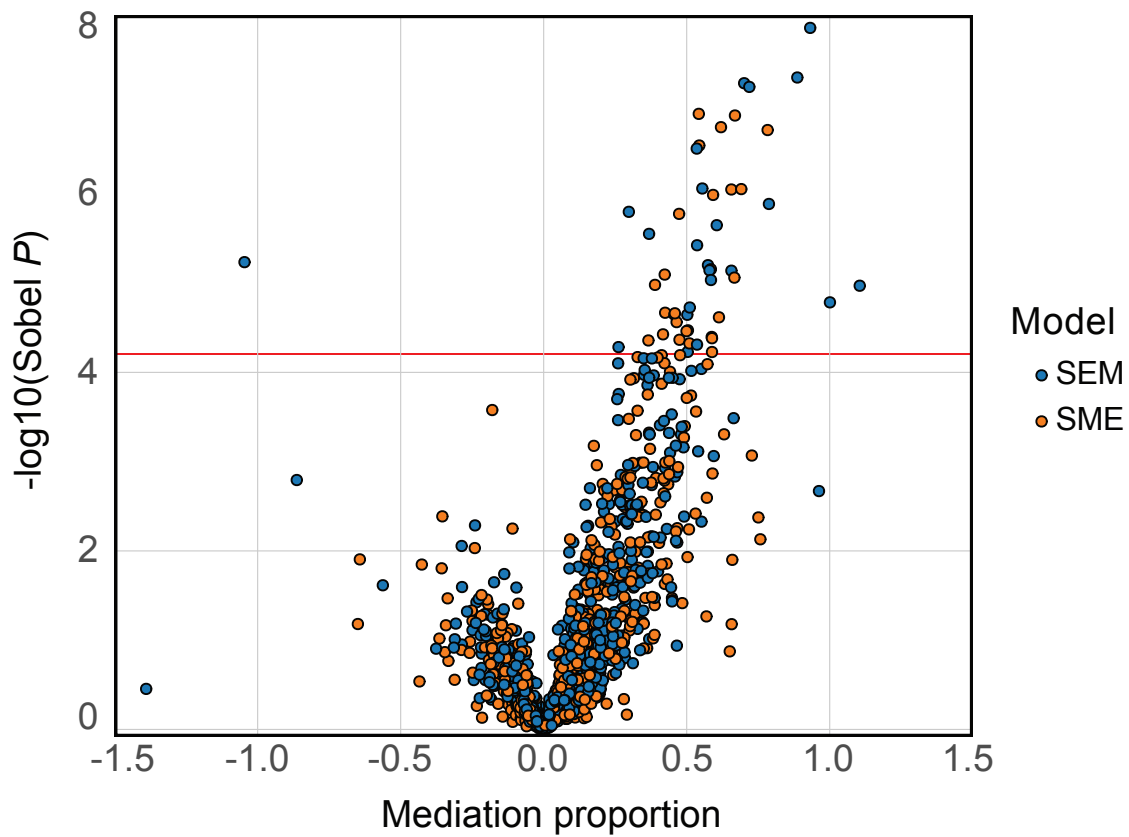

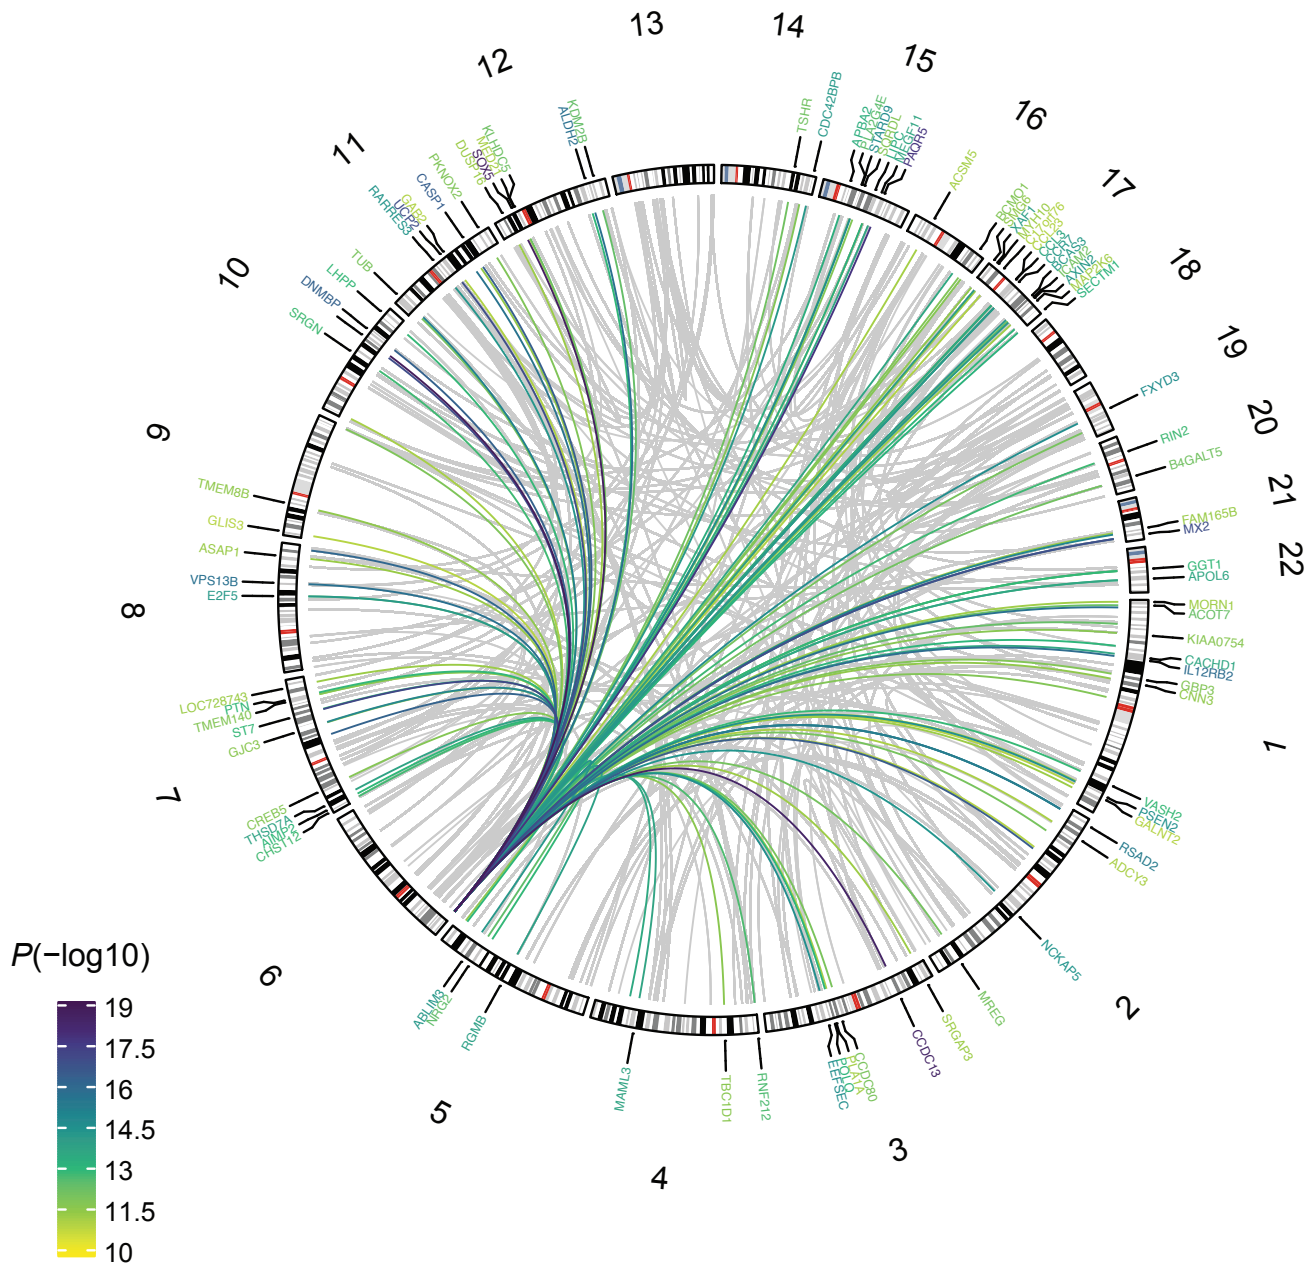

Source: https://biorxiv.org/content/10.1101/2021.03.23.436704v1.full.pdf
